# Supplementary material for: The effect of a web-based depression intervention on suicide ideation: secondary outcome from a randomised controlled trial in a helpline
Source: PubMed Central journal article supplement — BMJ Open. 2013 Jun 26;3(6):e002886. doi: 10.1136/bmjopen-2013-002886 (PMC3696875; doi:10.1136/bmjopen-2013-002886), 2013-06-26
Supplement: bmjopen-2013-002886.draft_revisions.pdf [file bmjopen-2013-002886.draft_revisions.pdf]

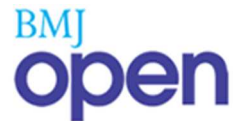

**The effect of a web based depression intervention on suicide ideation. Secondary outcome from a randomised controlled trial.**

|                                 |                                                                                                                                                                                                                                                                                                                                                                                                                                                                                                                           |
|---------------------------------|---------------------------------------------------------------------------------------------------------------------------------------------------------------------------------------------------------------------------------------------------------------------------------------------------------------------------------------------------------------------------------------------------------------------------------------------------------------------------------------------------------------------------|
| Journal:                        | <i>BMJ Open</i>                                                                                                                                                                                                                                                                                                                                                                                                                                                                                                           |
| Manuscript ID:                  | bmjopen-2013-002886                                                                                                                                                                                                                                                                                                                                                                                                                                                                                                       |
| Article Type:                   | Research                                                                                                                                                                                                                                                                                                                                                                                                                                                                                                                  |
| Date Submitted by the Author:   | 15-Mar-2013                                                                                                                                                                                                                                                                                                                                                                                                                                                                                                               |
| Complete List of Authors:       | Christensen, Helen; Black Dog Institute, University of New South Wales, School of Medicine<br>Farrer, Lou; Australian National University, Centre for Mental Health Research<br>Batterham, Philip; Australian National University, Centre for Mental Health Research<br>Mackinnon, Andrew; University of Melbourne, Orygen Youth Health<br>Griffiths, Kathleen; Australian National University, Centre for Mental Health Research<br>Donker, Tara; Black Dog Institute, University of New South Wales, School of Medicine |
| <b>Primary Subject Heading</b>: | Public health                                                                                                                                                                                                                                                                                                                                                                                                                                                                                                             |
| Secondary Subject Heading:      | Mental health                                                                                                                                                                                                                                                                                                                                                                                                                                                                                                             |
| Keywords:                       | Suicide & self-harm < PSYCHIATRY, Depression & mood disorders < PSYCHIATRY, Internet, Telephone                                                                                                                                                                                                                                                                                                                                                                                                                           |
|                                 |                                                                                                                                                                                                                                                                                                                                                                                                                                                                                                                           |

SCHOLARONE™  
Manuscripts

**The effect of a web based depression intervention on suicide ideation. Secondary outcome from a randomised controlled trial.**

Helen Christensen<sup>1</sup>, Lou Farrer<sup>2</sup>, Philip J Batterham<sup>2</sup>, Andrew Mackinnon<sup>3</sup>, Kathleen M Griffiths<sup>2</sup> and Tara Donker<sup>1</sup>

<sup>1</sup>*The Black Dog Institute, University of New South Wales, Sydney, NSW, Australia;*

<sup>2</sup>*Centre for Mental Health Research, Australian National University, Canberra, ACT,*

*Australia;* <sup>3</sup>*Orygen Youth Health, University of Melbourne, Melbourne, VIC, Australia*

Corresponding author:

Helen Christensen

The Black Dog Institute, University of New South Wales, Hospital Road, Prince of Wales Hospital, Randwick 2031, Sydney, NSW, Australia

E: [h.christensen@unsw.edu.au](mailto:h.christensen@unsw.edu.au)

P: +612 9382 9288

F: +61 2 9382 8208

*Key words: Suicide, Depression, Telephone, Internet*

*Word count: 4,076*

## Abstract

Objectives: The effect of web-based interventions for depression on suicide ideation in call centres is not known. The aim of this study was to determine if web-based Cognitive Behaviour Therapy (CBT) with and without telephone support is effective in reducing suicide ideation compared to treatment as usual in a helpline. A secondary aim was to examine the factors that predict change in suicide ideation. Putative predictors included level of baseline depression, suicide behaviour, baseline anxiety and type of intervention.

Design: Randomised Controlled Trial

Setting: Lifeline, Australia's 24-hour telephone counselling service Participants: 155 callers to a national helpline service with moderate to high psychological distress.

Interventions: participants were recruited and randomised to receive either 6 weeks of Internet CBT plus weekly telephone follow-up; Internet CBT only; weekly telephone follow-up only; or a wait-list treatment as usual (TAU) control group.

Primary and secondary outcome measures: Suicidal ideation was measured using four items from the 28-item General Health Questionnaire (GHQ-28; [1]). Predictors of change in ideation were tested using logistic regression analysis.

Results: Regardless of intervention condition, participants showed significant reductions in suicidal ideation over twelve months ( $p < 0.001$ ). Higher baseline suicidal behaviour decreased the odds of remission of suicidal ideation at post-intervention (OR: 0.409 ( $p < 0.001$ )). However, change in depression over the course of the interventions was associated with improvement in suicide ideation (OR: 1.165,  $p < 0.001$ ).

1  
2  
3  
4 Conclusions: Suicide ideation declines with and without proactive intervention.

5  
6 Improvements in depression are associated with the resolution of suicide ideation.

7  
8 Specific interventions focussing on suicide ideation should be further investigated.

9  
10 TRIAL REGISTRATION: Controlled-Trials.com ISRCTN93903959.

## 11 12 13 14 15 **ARTICLE SUMMARY**

### 16 17 **Article focus:**

- 18  
19 • To evaluate the effectiveness of a web-based Cognitive Behaviour Therapy
- 20  
21 intervention on suicide ideation in a helpline.
- 22  
23 • To examine predictors of suicide ideation resolution
- 24  
25

### 26 27 **Key messages:**

- 28  
29 • Irrespective of intervention condition, participants' suicidal ideation declined
- 30  
31 over time at post-test, and six months. Declines in suicidal ideation remained
- 32  
33 significant at 12 month follow-up
- 34  
35 • Suicide ideation reduces significantly more in those individuals who also had
- 36  
37 resolving depression.
- 38  
39 • While CBT internet interventions are significantly more effective in resolving
- 40  
41 depression symptoms compared to control conditions, these operate no more
- 42  
43 successfully than current call centre practice in resolving suicide ideation.
- 44  
45 • Our findings demonstrate the importance of not excluding suicidal participants
- 46  
47 from interventions designed to target depression.
- 48  
49

### 50 51 **Strengths and limitations of this study:**

- 52  
53 • The study used a Randomised Controlled Trial.
- 54  
55

- The addition of the TAU control condition is a significant improvement over previous trials.
- Because all scores were initially high at baseline, the lower scores on the second occasion of measurement may have been due to reversion to the mean.

For peer review only

## INTRODUCTION

Suicide prevention interventions are delivered every day through crisis intervention lines and through chat in call centres. In Australia, Lifeline reports that over 50 high risk telephone calls are answered daily [2]. However, despite the load taken by suicide prevention crisis lines in responding to callers at risk, there has been little investigation of the role of crisis lines in reducing suicide risk, or in reducing risk factors associated with suicide risk, such as depression.

To date, the research evidence from suicide call centres has largely focussed on evaluating interventions using the telephone, and to our knowledge, only one randomised controlled trial (RCT) has been conducted. This study [3] evaluated the effects of two brief telephone psychotherapies in reducing general distress [Solution Focussed Brief Therapy (SFBT) and Common Factors Therapy (CFT)] compared to a waitlist control condition using 85 individuals recruited via a suicide hotline. Outcome measures included the Brief Psychiatric Rating Scale, and the Beck Depression Inventory. Drop out was high in the SFBT condition (50%) compared to the CFT condition (37%) and across both conditions drop out occurred before the first session. Relative to the waitlist control, significant reductions in several measures of depression and anxiety symptoms were found in participants who completed the interventions, with effect sizes estimated in the range of .67 and .93. However, outcomes on suicide specific measures were not reported. A highly cited, although uncontrolled study, used a follow-up design (pre-post outcomes) to evaluate the effectiveness of a crisis line for non-suicidal crisis callers (n=1617, of whom 801 provided follow-up data) [4]. Callers' levels of crisis and hopelessness were rated during the calls and found to decrease during the course of the call. In a second study, focussing on 1,085 participants who

1  
2  
3  
4 were suicidal Gould et al. [5] found that levels of intent to die over the course of a call  
5  
6 decreased and that there were continuing falls in hopelessness and psychological pain  
7  
8 over the continuing weeks.  
9

10  
11  
12  
13  
14  
15 Web-based interventions are now more frequently used in call centres, and research of  
16  
17 their usefulness is emerging in community settings. Two studies of online e-health  
18  
19 applications targeting either risk factors for suicide (depression) or suicide ideation were  
20  
21 published in 2012. The first was an uncontrolled service evaluation which found a 30%  
22  
23 reduction in suicide ideas [6] over the course of a depression web program. The second  
24  
25 was a randomised controlled trial of an online intervention which examined the  
26  
27 effectiveness and cost effectiveness of an automated six module, six week, intervention  
28  
29 specifically targeting suicide ideation for individuals with mild to moderate suicidal  
30  
31 thoughts. The intervention was based on Cognitive Behaviour Therapy (CBT), with  
32  
33 Dialectical Behaviour Therapy, Problem Solving Therapy and Mindfulness Cognitive  
34  
35 Behaviour Therapy included. Significant reductions in suicidal thoughts were found  
36  
37 relative to Control condition. The mean incremental cost-effectiveness ratio (ICER) was  
38  
39 estimated to be €34,727 (US \$41,325) for an additional treatment response, indicating  
40  
41 annual cost savings per treatment responder [7].  
42  
43  
44  
45  
46  
47

48  
49 In 2012, we published the results of a randomised controlled trial investigating  
50  
51 the effects of a web application in reducing depression and anxiety in a large call centre  
52  
53 [8, 9]. This trial compared four conditions: a treatment as usual condition (TAU), where  
54  
55 the participant could call the crisis line at any time; a telephone support service where  
56  
57 the participant was contacted for 10 minutes once a week for six weeks; a CBT internet  
58  
59  
60

1  
2  
3  
4 program for depression combined with a evidence-based depression information  
5  
6 website, and a combined condition which incorporated telephone call back and the web  
7  
8 programs. Both the web programs alone, and the web programs in combination with the  
9  
10 telephone call back, were effective at 12 months in reducing depression symptoms,  
11  
12 relative to TAU. This study also measured suicide ideation, and in this paper, we report  
13  
14 the results using this outcome measure.  
15  
16

17  
18 Suicide ideation is a substantial risk factor for suicide attempt. Theories of  
19  
20 suicide causation point to the importance of depression and hopelessness in leading to  
21  
22 increased levels of suicide ideation and attempts (see [10]). We hypothesised that  
23  
24 suicide ideation would be reduced over time in those conditions which successfully  
25  
26 reduced depression. Accordingly, we first examined the effect of the four interventions  
27  
28 conditions on suicide ideation. For suicide ideation, we hypothesised that the web CBT  
29  
30 intervention focussing on reducing depression—with or without the telephone call  
31  
32 back— would result in significantly greater reduction of suicide ideation than the other  
33  
34 two conditions, which did not include interventions specifically aiming to reduce  
35  
36 depression. We then used logistic regression to explore which factors, in addition to  
37  
38 any effect of the intervention, predicted changes in suicide ideation at post-test. These  
39  
40 factors were baseline suicidality, baseline depression, baseline anxiety, age, gender,  
41  
42 education, workforce participation, and changes in depression and anxiety over the  
43  
44 course of the intervention (pre to post-test).  
45  
46  
47  
48  
49  
50  
51

## 52 **METHOD**

53  
54 Data for this study were collected as part of a randomized controlled trial of the  
55  
56 impact of a Web-based CBT and psychoeducation intervention on depression symptoms  
57  
58  
59  
60



1  
2  
3  
4 [9]. The trial comprised four arms: (i) a Web-based CBT intervention; (ii) a Web-based  
5  
6 CBT intervention delivered in conjunction with a telephone support line; (iii) the  
7  
8 telephone support line alone, and (iv) TAU, which consisted of the opportunity to  
9  
10 contact the support line if needed.  
11

## 12 13 **Participants**

14  
15  
16 Participants were 155 callers to Lifeline, Australia's 24-hour telephone  
17  
18 counselling service, recruited between July 2007 and January 2009. A total of 910  
19  
20 callers agreed to be screened by telephone. Of these, 142 (15.6%) were subsequently  
21  
22 unable to be contacted, 61 (7%) were later unwilling to participate, and 337 (37%) did  
23  
24 not meet eligibility criteria. Respondents were not eligible for inclusion in the trial if  
25  
26 they (1) scored less than 22 on the Kessler Psychological Distress Scale [11] (138/337,  
27  
28 41%), (2) had, by self-report, a diagnosis of schizophrenia or bipolar disorder (89,  
29  
30 26%), or (3) did not have Internet access (67, 20.0%). Ineligible participants were  
31  
32 offered brochures sent by mail containing information about the Web intervention used  
33  
34 in the trial. Of the 370 people eligible for inclusion in the trial, 155 completed informed  
35  
36 consent procedures and pre-intervention assessments, and were randomly assigned to  
37  
38 the trial conditions.  
39  
40  
41  
42  
43

## 44 **Procedure**

45  
46  
47 Following screening and informed consent procedures, pre-intervention data  
48  
49 were obtained through a self-report questionnaire mailed to participants. A block  
50  
51 randomization procedure was used, with stratification based on site of recruitment and  
52  
53 severity of psychological distress at screening. Allocation of participants to trial  
54  
55 conditions was conducted independently by a research assistant not involved in the day-  
56  
57  
58  
59  
60

1  
2  
3  
4 to-day running of the trial. Following randomization, all participants were contacted by  
5  
6 telephone and were mailed the relevant materials for their allocated condition.  
7  
8

## 9 10 **Intervention and Trial Conditions**

11  
12  
13 The Web-only intervention consisted of Web-based psychoeducation (in week 1  
14 provided by BluePages: bluepages.anu.edu.au) combined with Web-based CBT (in  
15 weeks 2–6 provided by MoodGYM: moodgym.anu.edu.au). Both of these Web  
16  
17 programs have been shown to reduce depression symptoms in community users [12]. A  
18  
19 printed manual containing week-by-week instructions for accessing the Web programs  
20  
21 (via a login) was mailed to participants at the start of the trial.  
22  
23  
24  
25  
26

27  
28 In the Web with telephone support condition, participants completed the Web  
29  
30 intervention and also received a weekly 10-minute telephone call from a Lifeline  
31  
32 telephone counsellor. The purpose of these calls was to address any issues associated  
33  
34 with the participants' use of the intervention.  
35  
36

37  
38 In the telephone call back only condition, participants received a weekly 10-minute  
39  
40 telephone call from a telephone counsellor. These scripted calls focused on various  
41  
42 environmental and lifestyle factors associated with depression.  
43  
44

45  
46 In the TAU condition, participants received neither the call back nor Web interventions,  
47  
48 but were free to use the Lifeline counselling service as needed. Participants in this  
49  
50 condition were wait-listed to receive the Web-only intervention following completion of  
51  
52 the 6-month follow-up.  
53  
54  
55  
56  
57  
58  
59  
60

1  
2  
3  
4 Participants in all 4 conditions were able to use the Lifeline telephone counselling  
5 service as needed, which provided usual emergency or support services. Any use of this  
6 service during the intervention period was additional to the 10-minute telephone calls  
7 offered as part of the Web with telephone support and telephone support-only  
8 intervention conditions. The 10-minute intervention calls were scripted and not intended  
9 to provide any form of psychological or supportive counselling.  
10  
11  
12  
13  
14  
15  
16

## 17 18 **Measures**

### 19 20 *Suicidal ideation*

21  
22 Suicidal ideation was measured using four items from the 28-item General  
23 Health Questionnaire (GHQ-28; [1]). The four questions measure suicidal ideation,  
24 asking respondents to indicate how they have felt over the last few weeks. The first two  
25 items: 'Have you recently felt that life is not worth living' and 'Have you recently found  
26 yourself wishing you were dead and away from it all' were scored on the 4-point scale:  
27 'Not at all', 'No more than usual', 'Rather more than usual' or 'Much more than usual'.  
28 The remaining two items: 'Have you recently had thoughts of the possibility that you  
29 might do away with yourself' and 'Have you recently found that the idea of taking your  
30 own life kept coming into your mind' were scored on the 4-point scale: 'Definitely not',  
31 'I don't think so', 'Has crossed my mind' or 'Definitely has'. Responses were then  
32 categorised in a binary manner, with the negatively-worded response categories (Not at  
33 all, No more than usual, definitely not, and I don't think so) scored with a 0, and the  
34 positively-worded response categories scored with a 1. Binary scores for each item were  
35 summed to provide a total scale score ranging from 0 to 4, with a higher score  
36 indicating higher suicidal ideation. This scoring system is that used for all items and sub  
37  
38  
39  
40  
41  
42  
43  
44  
45  
46  
47  
48  
49  
50  
51  
52  
53  
54  
55  
56  
57  
58  
59  
60

1  
2  
3  
4 scores of the GHQ-28, which has been validated in Australian populations [13]. The  
5  
6 four suicide items from the GHQ-28 have been used extensively by Goldney and  
7  
8 colleagues to assess suicidal ideation in a number of Australian samples [14-16]. These  
9  
10 items have been validated relative to other well established measures of suicidal intent  
11  
12 and hopelessness [17, 18].  
13

### 14 15 16 17 *Predictor variables* 18

19  
20 Depression symptoms were measured by the Center for Epidemiologic Studies  
21  
22 Depression Scale (CES-D)[19], a widely used, 20 item scale with strong reliability and  
23  
24 validity [19, 20], with scores ranging from 0 to 60. Anxiety symptoms were assessed  
25  
26 using the 14-item anxiety scale from the Depression, Anxiety and Stress Scales (DASS-  
27  
28 A;[21]. Each of these items is rated on a four-point scale from 0 (“did not apply to me at  
29  
30 all”) to 4 (“applied to me most of the time”), with total scores ranging from 0 to 42. The  
31  
32 reliability and validity of the DASS-A scale has been demonstrated previously ([22,  
33  
34 23]).  
35  
36

37  
38 Demographic variables including age, gender, educational attainment and  
39  
40 workforce participation were assessed by self-report in the pre-test survey. Educational  
41  
42 attainment was based on two items assessing highest level of education, which were  
43  
44 used to form an estimate of total number of years of education. Workforce participation  
45  
46 was based on an item assessing employment status, with “unemployed” and “not in the  
47  
48 labour force” categorised as non-participation, and employed “full-time” or “part-time”  
49  
50 categorised as participation.  
51  
52

### 53 54 55 **Statistical analyses** 56 57 58 59 60

1  
2  
3  
4 Differential changes in suicide ideation across the four conditions were assessed  
5 using mixed model repeated measures analysis of variance. Within-person variation was  
6 modeled using an unstructured covariance matrix and degrees of freedom were  
7 estimated using Satterthwaite's approximation. This model included the fixed effects of  
8 condition, time (pre, post, 6 month, 12 month) and the interaction between condition  
9 and time. The presence of a significant interaction between an active intervention and  
10 the TAU condition over time would indicate a significant reduction in suicidal ideation  
11 for that condition relative to control. Within-condition change in suicidal ideation was  
12 also examined using this model. Mixed models yield an intention-to-treat analysis,  
13 using all available measurement points for each participant under the assumption that  
14 withdrawal data are missing at random. Two participants with missing suicidal ideation  
15 scores at baseline were omitted from analyses. To evaluate whether the scoring of the  
16 suicidal ideation scale influenced the findings, the models were re-estimated using a  
17 continuous score of suicidal ideation, assessed at each time point as the sum of  
18 responses to the four ideation items (range 0-12).  
19  
20  
21  
22  
23  
24  
25  
26  
27  
28  
29  
30  
31  
32  
33  
34  
35  
36

37 Logistic regression was then used to examine predictors of suicidal ideation at  
38 post-intervention, defined as a suicidal ideation score of 0. In particular, the hypothesis  
39 was assessed that reduction in depression symptoms from pre- to post-intervention  
40 predicted remission of ideation. Only completers of the post-test assessment were  
41 included in this analysis. A depression symptom change score from pre- to post-  
42 intervention was calculated by subtracting post-intervention CES-D scores from pre-  
43 intervention scores, with positive scores indicating a reduction/improvement in  
44 symptoms. The effect of anxiety symptoms and changes in anxiety were assessed in the  
45 same way. Suicidal ideation scores (ranging from 0 to 4) were coded categorically as  
46  
47  
48  
49  
50  
51  
52  
53  
54  
55  
56  
57  
58  
59  
60

1  
2  
3  
4 “0” (score  $\geq 1$ , indicating some suicidal ideation) or “1” (score = 0, no ideation). To  
5  
6 control for baseline depression, baseline anxiety, baseline suicidality and intervention  
7  
8 condition, these variables were included in the regression simultaneously with the  
9  
10 depression change score. In addition, age, gender, education and workforce  
11  
12 participation were included in the models due to their potential associations with  
13  
14 suicidal ideation.  
15  
16  
17  
18  
19  
20  
21  
22  
23  
24  
25  
26  
27  
28  
29  
30  
31  
32  
33  
34  
35  
36  
37  
38  
39  
40  
41  
42  
43  
44  
45  
46  
47  
48  
49  
50  
51  
52  
53  
54  
55  
56  
57  
58  
59  
60

## RESULTS

### Descriptives and changes in suicide ideation

Table 1 shows the characteristics of the sample at baseline, with mental health measures for post-intervention also presented. The age range was 19-72, with a median age of 42 years. The majority of participants (57%) had graduated from high school. Most of the participants were female and approximately half were in the work force. Depression and anxiety scores were considerably higher than the cut points for the scales used at both time points, although there were decreases from pre- to post-intervention. Likewise, high rates of suicidality were observed, with 62.7% and 41.5% reporting suicidal ideation at pre- and post-intervention respectively.

**Table 1.** Characteristics of participants

|                                                 | N   | Mean  | SD    |
|-------------------------------------------------|-----|-------|-------|
| Age                                             | 155 | 41.49 | 12.35 |
| Years of education                              | 150 | 13.47 | 2.67  |
| CES-D depression score, pre-intervention        | 152 | 36.25 | 10.22 |
| CES-D depression score, post-intervention       | 107 | 28.68 | 14.40 |
| DASS anxiety score, pre-intervention            | 154 | 13.34 | 8.03  |
| DASS anxiety score, post-intervention           | 107 | 11.45 | 10.16 |
| GHQ suicidal ideation score - pre-intervention  | 153 | 1.73  | 1.64  |
| GHQ suicidal ideation score - post-intervention | 106 | 1.00  | 1.45  |
|                                                 | N   | Count | %     |
| <i>Gender</i>                                   | 155 |       |       |
| Female                                          |     | 127   | 81.9% |
| Male                                            |     | 28    | 18.1% |
| <i>Workforce participation</i>                  | 155 |       |       |
| Participation                                   |     | 72    | 46.5% |
| Non-participation                               |     | 83    | 53.5% |
| <i>Treatment condition</i>                      | 155 |       |       |
| Internet only                                   |     | 38    | 24.5% |
| Internet plus telephone support                 |     | 45    | 29.0% |
| Telephone support only                          |     | 37    | 23.9% |
| Treatment as usual                              |     | 35    | 22.6% |

*Mixed models: Effect of intervention type on suicidal ideation*

Suicide ideation declined significantly over the 12 month period ( $F_{3,95.4} = 15.06$ ,  $p < 0.001$ ). However, differences in change over time between conditions were not significant ( $F(8,115.8) = 1.13$ ,  $p = .352$ ). Figure 1 shows the estimated marginal means for suicidal ideation across measurement occasions.

**Figure 1:** Estimated marginal means for suicidal ideation across measurement occasions.

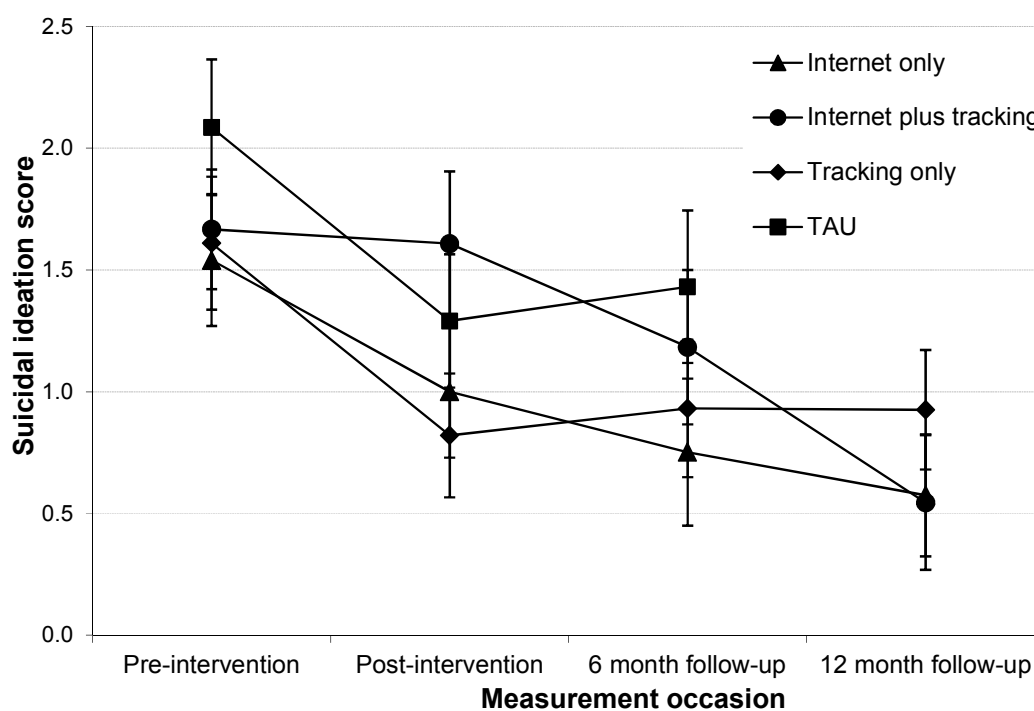

*Within group contrasts*

As can be seen in Table 2, planned contrasts revealed that participants in the call back only and TAU conditions showed significant declines in suicidal ideation from pre- to post-intervention and from pre-intervention to 6 month follow-up. Declines in suicidal ideation from pre-intervention to 12 month follow-up were significant for participants in all conditions in which the difference could be assessed.



**Table 2.** Within group contrast estimates and significance tests for suicidal ideation

| Condition                    | Statistic         | Contrast                              |                                       |                                        |
|------------------------------|-------------------|---------------------------------------|---------------------------------------|----------------------------------------|
|                              |                   | Pre-intervention to post-intervention | Pre-intervention to 6 month follow-up | Pre-intervention to 12 month follow-up |
| Internet only                | Contrast estimate | -.54                                  | -.79                                  | -.97                                   |
|                              | Test value        | $t(109.8) = -1.98$                    | $t(101.5) = -2.50$                    | $t(73.2) = -3.65$                      |
|                              | <i>p</i> value    | .050                                  | .016                                  | <.001                                  |
| Internet + telephone support | Contrast estimate | -.06                                  | -.48                                  | -1.12                                  |
|                              | Test value        | $t(121.3) = -.20$                     | $t(106.2) = -1.45$                    | $t(80.8) = -3.91$                      |
|                              | <i>p</i> value    | .85                                   | .15                                   | <.001                                  |
| Telephone support only       | Contrast estimate | -.79                                  | -.68                                  | -.68                                   |
|                              | Test value        | $t(105.6) = -3.05$                    | $t(100.0) = -2.22$                    | $t(78.0) = -2.61$                      |
|                              | <i>p</i> value    | .003                                  | .029                                  | .011                                   |
| Treatment as usual           | Contrast estimate | -.80                                  | -.66                                  |                                        |
|                              | Test value        | $t(108.0) = -2.89$                    | $t(103.1) = -1.96$                    |                                        |
|                              | <i>p</i> value    | .005                                  | .053                                  |                                        |

*Between group contrasts*

No significant differences were found between conditions at post-intervention, 6 month follow-up, or 12 month follow-up: Internet only vs. TAU (post-test: Contrast estimate = .26;  $p = .51$ ; 6-month follow-up: Contrast estimate = -.14,  $p = .77$ ); Internet only vs. Telephone support only (post-test: Contrast estimate = .25;  $p = .51$ ; 6-month follow-up: Contrast estimate = -.11,  $p = .80$ ; 12-month follow-up: Contrast estimate = -.28;  $p = .45$ ); Internet + telephone support vs. TAU (post-test: Contrast estimate = .74;  $p = .07$ ; 6-month follow-up: Contrast estimate = .17,  $p = .72$ ); Internet + telephone support vs Telephone support only (post-test: Contrast estimate = .73;  $p = .07$ ; 6-month follow-up:

1  
2  
3  
4 Contrast estimate = .19,  $p = .67$ ; 12-month follow-up: Contrast estimate =  $-.44$ ;  $p = .26$ );  
5  
6 Telephone support only vs TAU (post-test: Contrast estimate = .01;  $p = .99$ ; 6-month  
7  
8 follow-up: Contrast estimate =  $-.02$ ,  $p = .96$ ); Internet only vs Internet + telephone  
9  
10 support (post-test: Contrast estimate =  $-.48$ ;  $p = .24$ ; 6-month follow-up: Contrast  
11  
12 estimate =  $-.31$ ,  $p = .51$ ; 12-month follow-up: Contrast estimate =  $.16$ ;  $p = .69$ ).

13  
14 To test whether the lack of between-group effects were related to scaling effects of the  
15  
16 suicidal ideation measure, the models were re-estimated using a continuous score for  
17  
18 suicidal ideation. As with the original analysis, there was significant reduction over time  
19  
20 in suicidal ideation scores ( $F_{3,94.5} = 14.08$ ,  $p < 0.001$ ). Again, there was no significant  
21  
22 interaction between condition and time ( $F_{8,89.9} = 0.81$ ,  $p = 0.598$ ), indicating no  
23  
24 significant difference in change of suicidal ideation scores between the intervention  
25  
26 groups across the study period.  
27  
28  
29  
30  
31

### 32 *Effect sizes for suicidal ideation*

33  
34  
35  
36  
37 At post-intervention, effect sizes were 0.10 (95% CI:  $-0.43$  to  $0.64$ ) for the  
38  
39 Internet only condition and 0.04 (95% CI:  $-0.54$  to  $0.62$ ) for the Internet plus call back  
40  
41 condition, compared to the TAU condition. Compared to call back only, effect sizes  
42  
43 were 0.28 (95% CI:  $-0.24$  to  $0.79$ ) for the Internet only condition and 0.41 (95% CI:  $-$   
44  
45  $0.15$  to  $0.98$ ) for the Internet plus call back condition. At 6 month follow-up, effect sizes  
46  
47 were 0.36 (95% CI:  $-0.24$  to  $0.96$ ) for the Internet only condition and 0.20 (95% CI:  $-$   
48  
49  $0.42$  to  $0.81$ ) for the Internet plus telephone support condition, compared to the TAU  
50  
51 condition. Compared to telephone support only, effect sizes were 0.08 (95% CI:  $-0.48$   
52  
53 to  $0.63$ ) for the Internet only condition and 0.07 (95% CI:  $-0.51$  to  $0.65$ ) for the Internet  
54  
55  
56  
57  
58  
59  
60

1  
2  
3  
4 plus telephone support condition. At 12 month follow-up, effect sizes were 0.28 (95%  
5  
6 CI: -0.33 to 0.89) for the Internet only condition and 0.45 (95% CI: -0.24 to 1.13) for  
7  
8 the Internet plus telephone support condition, compared with the call back only  
9  
10 condition.

### 11 12 13 14 15 *Predictors of suicide ideation*

16  
17 A logistic regression analysis was designed to measure predictors of suicide  
18 ideation change taking account of intervention condition. Consistent with findings  
19 reported above, compared to baseline (M:1.73; SD: 1.64; N=153) suicidal ideation  
20 significantly decreased in the whole sample at post-test (M:1.00; SD:1.45; N=106), 6-  
21 month (M:0.99; SD:1.54; N=91) and 12-month follow-up (M:0.66; SD:1.27; N=56).  
22  
23 However, as there was no significant interaction effect between condition and time on  
24 suicidal ideation, this interaction was not retained in the model. Table 3 shows the  
25 results for the model with interactions excluded. As would be expected, higher levels of  
26 suicide ideation at baseline were associated with significantly reduced odds of absence  
27 of suicide ideation at post-test. Neither baseline depression nor anxiety was significantly  
28 associated with no suicide ideation at post-test. There were also no significant effects of  
29 any of the demographic characteristics. However, a greater improvement in depression  
30 symptoms from pre- to post-intervention was associated with increased odds of no  
31 suicidal ideation at post-intervention. At baseline, the majority of participants (n=93;  
32 62.0%) reported both depressive symptoms and suicidal ideation. This proportion  
33 decreased at all time-points following the interventions [post-test: 44 (41.5%); 6-months  
34 follow-up: 30 (33.0%); 12-months follow-up: 13 (23.2%)]. Based on McNemar's tests  
35 using completers of each assessment, these decreases were significant at all three time  
36  
37  
38  
39  
40  
41  
42  
43  
44  
45  
46  
47  
48  
49  
50  
51  
52  
53  
54  
55  
56  
57  
58  
59  
60

points ( $P = 0.005$ ,  $P < 0.001$  and  $P = 0.002$  at post, 6-months and 12-months respectively). There was no significant difference in the proportion of participants with depression but no suicidal ideation, except at 12-month follow-up [baseline:  $n=53$  (35.3%); post-test:  $n=42$  (39.6%), 6-months follow-up:  $n=28$  (30.8%); 12-months follow-up: 18 (32.1%);  $P = 1.00$ ;  $P = 0.15$  and  $P = 0.019$  at post, 6-months and 12-months respectively).

**Table 3.** Logistic regression analyses of remission of suicidal ideations (completers only)

|                                  | OR    | p                | 95% CI |        |
|----------------------------------|-------|------------------|--------|--------|
|                                  |       |                  | Lower  | Upper  |
| Suicidality score at baseline    | 0.409 | <b>&lt;0.001</b> | 0.249  | 0.671  |
| <i>Condition</i>                 | --    | 0.239            |        |        |
| TAU                              | 1.000 | --               |        |        |
| Internet only                    | 1.408 | 0.699            | 0.248  | 8.001  |
| Internet + telephone support     | 0.323 | 0.234            | 0.050  | 2.082  |
| Telephone support only           | 2.442 | 0.284            | 0.476  | 12.512 |
| Baseline depression score        | 0.926 | 0.081            | 0.849  | 1.010  |
| Depression change score          | 1.165 | <b>&lt;0.001</b> | 1.070  | 1.267  |
| Baseline anxiety score           | 1.066 | 0.256            | 0.955  | 1.190  |
| Anxiety change score             | 0.986 | 0.836            | 0.859  | 1.130  |
| Gender: F vs M                   | 0.992 | 0.993            | 0.174  | 5.646  |
| Age                              | 1.051 | 0.054            | 0.999  | 1.106  |
| Years of education               | 0.897 | 0.438            | 0.681  | 1.181  |
| Not in labour force vs. employed | 0.915 | 0.899            | 0.233  | 3.592  |

\*only main effects included.

## DISCUSSION

This was the first study to examine the effect of online interventions on suicide ideation in a call centre using a randomised controlled trial design. In contrast to our hypothesis, results from our study indicated that irrespective of intervention condition, participants' suicidal ideation declined over time at post test, and six months. Declines in suicidal ideation remained significant at 12 month follow-up. Although there were small effects at post-test and medium effect sizes at follow-up among the intervention conditions, there were no consistent overall effects for condition. Participants having higher baseline suicide scores were more likely to continue experiencing suicidal ideation at post-intervention, while those with greater improvements in depression symptoms were less likely to experience suicide ideation at post-intervention.

Several studies have shown reductions of suicide ideation in uncontrolled pre post trials of counselling or internet CBT (e.g.,[5, 6]). This is, to our knowledge the first randomised controlled trial of an intervention in a call line centre, comparing a number of active interventions to treatment as usual. The study is also unique in that it examined predictors of ideation change, taking account of the effect of intervention. As previously reported for this study [9], web based CBT, and web CBT with counsellor call back significantly reduced depression symptoms relative to TAU. These findings indicate that suicide ideation did not follow the same pattern as depression in response to the intervention, and, more generally, that suicide ideation was not strictly tethered to depression. Nevertheless, the regression analysis found that taking account of intervention type, changes in depression did predict later lower levels of ideation, suggesting that depression change is an important albeit not necessarily the only factor in reducing ideation. We interpret these findings to suggest that change in depression, in

1  
2  
3  
4 what ever way it is brought about, is a contributing variable to reduction in suicide  
5  
6 ideation. A second explanation for the findings is that changes in suicide ideation and  
7  
8 changes in depression follow different time trajectories, with ideation resolving faster  
9  
10 than depression. The two constructs are likely to be interactive, with ideation reduction  
11  
12 assisting in lowering depression symptoms over time. Hopelessness may mediate both  
13  
14 depression and ideation but may influence each within different time frames [24].  
15  
16 Interestingly, a recent meta-analysis [25] has examined the effects of face-to-face  
17  
18 psychotherapy for adult depression on suicidality. It found a non-significant effect of  
19  
20 psychotherapy in the reduction of suicidality but a significant effect for depression,  
21  
22 consistent with concept that depression and suicidality are not strictly tethered.  
23  
24  
25

26  
27 Suicide ideation resolved in our TAU condition, consistent with the notion that  
28  
29 ideation is responsive to the passage of time. This finding, however, does not rule out  
30  
31 the possibility that specific psychological or support interventions will support faster  
32  
33 resolution of suicide ideation symptoms. Indeed the intervention developed by Van  
34  
35 Spijker et al. [7] may be one of these specific interventions.  
36  
37  
38  
39

#### 40 *Limitations of the study*

41  
42  
43

44  
45 One explanation of the failure to find an effect of intervention type on suicide  
46  
47 ideation outcomes is that these findings are due to regression to the mean. Because all  
48  
49 scores were initially high at baseline, scores would be expected to revert to the mean on  
50  
51 the second occasion of measurement. Intervention completion rates were lower in our  
52  
53 study relative to some other trials of web-based treatments for depression [26] but not of  
54  
55 other telephone-based services [3]. The reasons for this are unclear. The current trial  
56  
57  
58  
59  
60

1  
2  
3  
4 was a true effectiveness trial employing a volunteer workforce for recruitment and call  
5  
6 back, and hence might be expected to be associated with greater recruitment and  
7  
8 adherence problems relative to the more controlled environment of an efficacy study  
9  
10 [27]. Also, the interventions were short, delivered by non-health professionals, and may  
11  
12 have constituted the only service received. The measure used to assess suicidality used  
13  
14 items that categorised outcomes dichotomously, and then summed responses, as per  
15  
16 scale score recommendations. Moreover, these scores were then further dichotomised in  
17  
18 the regression analysis. This is essentially a conservative treatment of data. We did  
19  
20 investigate whether other continuous scoring methods might reveal intervention effects.  
21  
22 These data did not yield any relationships. Finally, we were not able to analyse the  
23  
24 influence of other psychological characteristics on treatment outcome, such as  
25  
26 hopelessness, or support from family, which might affect both depression and suicidal  
27  
28 ideation levels. These measures were not included in our study.  
29  
30  
31  
32  
33

#### 34 *Future research*

35  
36  
37 Replications of this trial need to be performed to check consistency of research  
38  
39 findings. Furthermore, examination of mediators of change such as hopelessness in  
40  
41 larger samples would add significantly to our knowledge of which components of  
42  
43 therapy are necessary for reduction of suicide ideation. Given the absence of differences  
44  
45 between conditions, it may be that one or more components present in each treatment  
46  
47 arm (e.g., giving hope, or participating in research) are responsible for change in  
48  
49 outcome. Identifying these components and altering their presence by intensifying or  
50  
51 omitting them in a new intervention trial would add to our current knowledge  
52  
53  
54  
55  
56  
57  
58  
59  
60

1  
2  
3  
4 mechanisms of change. Investigation of the causes of reductions in suicide ideation is  
5  
6 warranted.  
7  
8

9  
10 *Clinical implications*  
11

12  
13 Despite the limitations, the current study clearly demonstrated that suicide  
14  
15 ideation declined irrespective of intervention, telephone counsellor contact or wait-list.  
16  
17 The addition of the TAU control condition is a significant improvement over previous  
18  
19 trials. The study demonstrated that, while CBT internet interventions are significantly  
20  
21 more effective in resolving depression symptoms than control conditions, these operate  
22  
23 no more successfully than current call centre practice in resolving suicide ideation.  
24  
25 Suicide ideation reduces significantly more effectively in those individuals who also  
26  
27 have resolving depression. The majority of people experiencing suicidal ideation do not  
28  
29 receive mental health treatment [28]. Internet-based or telephone based interventions  
30  
31 have the ability advantage that they can be easily accessed by large numbers of people,  
32  
33 on an anonymous basis. In line with Watts et al. [6], our findings demonstrate the  
34  
35 importance of not excluding suicidal participants from interventions designed to target  
36  
37 depression.  
38  
39  
40  
41  
42  
43

44 **ACKNOWLEDGEMENTS**  
45  
46  
47

48  
49 Nicole Burgess coordinated and conducted data collection for the trial. Dawn O'Neil  
50  
51 was involved in obtaining funding for the trial and coordinating Lifeline Australia's  
52  
53 collaboration with the ANU. Assoc Prof Richard O'Kearney was a member of LF's PhD  
54  
55 supervisory panel. Trevor Carlyon was also involved in coordinating Lifeline staff and  
56  
57  
58  
59  
60



1  
2  
3  
4 volunteer involvement in the trial and supported Nicole in her role. The e hub team  
5  
6 supported the trial implementation. We acknowledge the contributions of the Lifeline  
7  
8 counselors who participated in this trial.  
9

## 10 11 12 **COMPETING INTERESTS**

13  
14  
15  
16  
17 None.  
18  
19

## 20 21 **FUNDING**

22  
23  
24  
25  
26 Australian Research Council Linkage Grant (LP0667970), 2006, 3 years, \$279,325  
27  
28 (Christensen, Griffiths, Mackinnon, Smith), Internet technologies, health informatics,  
29  
30 and statistical models, and new delivery platforms in call centres (CIA).  
31  
32 HC and PB were supported by NHMRC 525411 and NHMRC Early Career Fellowship  
33  
34 1035262. KMG is supported by NHMRC Fellowship No. 525413.  
35  
36  
37  
38  
39

## 40 **CONTRIBUTORSHIP**

41  
42 HC, KG, AJM conceived the study, LF, HC, KG, AJM designed the study, HC, TD  
43  
44 drafted the initial manuscript, LF, PB, AJM prepared and cleaned the data and  
45  
46 conducted initial data analysis. All authors contributed to revised drafts.  
47  
48  
49

## 50 **DATA SHARING**

51  
52 The data from this study are available through email to Dr Philip Batterham  
53  
54  
55 p.batterhan@anu.edu.au  
56  
57  
58  
59  
60

## REFERENCE LIST

1. Goldberg, D. and V. Hillier, *A scaled version of the General Health Questionnaire*. Psychological Medicine, 1979. **9**: p. 139-145.
2. Lifeline Australia, *Lifeline Australia Annual Report 2009-2010*, 2010, Lifeline Australia Ltd: Canberra.
3. Rhee, W., et al., *Efficacy of brief telephone psychotherapy with callers to a suicide hotline*. Suicide and Life Threatening Behaviour, 2005. **35**(3): p. 317-28.
4. Kalafat, J., et al., *An evaluation of crisis hotline outcomes. Part 1: Nonsuicidal crisis callers*. Suicide Life Threat Behav, 2007. **37**(3): p. 322-37.
5. Gould, M.S., et al., *An evaluation of crisis hotline outcomes. Part 2: Suicidal callers*. Suicide Life Threat Behav, 2007. **37**(3): p. 338-52.
6. Watts, S., et al., *A clinical audit of changes in suicide ideas with internet treatment for depression*. BMJ Open, 2012. **2**(5).
7. van Spijker, B.A., A. van Straten, and A.J. Kerkhof, *The effectiveness of a web-based self-help intervention to reduce suicidal thoughts: a randomized controlled trial*. Trials, 2010. **11**: p. 25.
8. Farrer, L., et al., *Internet-based CBT for depression with and without telephone tracking in a national helpline: randomised controlled trial*. PLoS One, 2011. **6**(11): p. e28099.
9. Farrer, L., et al., *Web-based cognitive behavior therapy for depression with and without telephone tracking in a national helpline: secondary outcomes from a randomized controlled trial*. J Med Internet Res, 2012. **14**(3): p. e68.

10. Nock, M.K., et al., *Cross-national analysis of the associations among mental disorders and suicidal behavior: findings from the WHO World Mental Health Surveys*. PLoS Med, 2009. **6**(8): p. e1000123.
11. Andrews, G. and T. Slade, *Interpreting scores on the Kessler Psychological Distress Scale (K10)*. Aust N Z J Public Health, 2001. **25**(6): p. 494-7.
12. Christensen, H., K.M. Griffiths, and A.F. Jorm, *Delivering interventions for depression by using the internet: randomised controlled trial*. BMJ, 2004. **328**(7434): p. 265.
13. Tennant, C., *The general health questionnaire: a valid index of psychological impairment in Australian populations*. Medical Journal of Australia, 1977. **2**: p. 392-394.
14. Goldney, R., et al., *Suicidal ideation: its enduring nature and associated morbidity*. Acta Psychiatrica Scandinavica, 1991. **83**(2): p. 115-20.
15. Goldney, R., et al., *Suicidal ideation in a random community sample: attributable risk due to depression and psychosocial and traumatic events*. Australian and New Zealand Journal of Psychiatry, 2000. **34**(1): p. 98-106.
16. Goldney, R., et al., *Anger, suicidal ideation, and attempted suicide: a prospective study*. Comprehensive Psychiatry, 1997. **38**(5): p. 264-8.
17. Goldney, R., et al., *Suicidal ideation in a young adult population*. Acta Psychiatrica Scandinavica, 1989. **79**: p. 481-489.
18. Watson, D., et al., *The measurement of suicidal ideation*. Crisis, 2001. **22**(1): p. 12-14.
19. LS, R., *The CES-D scale: A self-report depression scale for research in the general population*. Applied Psychological Measurement, 1977. **1**: p. 16.

- 1  
2  
3  
4 20. Roberts RE, V.S., *The Center for Epidemiologic Studies Depression Scale: It's*  
5 *use in a community sample.* American Journal of Psychiatry, 1983. **140**: p. 5.  
6  
7  
8 21. Lovibond, S.a.L.P., *Manual for the Depression Anxiety Stress Scales.* . Vol. 2.  
9 1995, Sydney: Psychology Foundation.  
10  
11  
12 22. Antony, M.M.B., P.J.; Cox, B.J., Enns, M.W. & Swinson, R.P., *Psychometric*  
13 *properties of the 42-item and 21-item versions of the Depression Anxiety Stress*  
14 *Scales (DASS) in clinical groups and a community sample.* Psychological  
15 *Assessment*, 1998. **10**: p. 5.  
16  
17  
18 23. Lovibond, S.a.L.P., *The structure of negative emotional states: Comparison of*  
19 *the Depression Anxiety Stress Scales (DASS) with the Beck Depression and*  
20 *Anxiety Inventories.* Behaviour Research and Therapy, 1995. **33**: p. 8.  
21  
22  
23 24. Thompson, E.A., et al., *The mediating roles of anxiety depression, and*  
24 *hopelessness on adolescent suicidal behaviors.* Suicide Life Threat Behav, 2005.  
25 **35**(1): p. 14-34.  
26  
27  
28 25. Cuijpers, P., et al., *The effects of psychotherapy for adult depression on*  
29 *suicidality and hopelessness: a systematic review and meta-analysis.* J Affect  
30 *Disord*, 2013. **144**(3): p. 183-90.  
31  
32  
33 26. Christensen, H., K.M. Griffiths, and L. Farrer, *Adherence in internet*  
34 *interventions for anxiety and depression.* J Med Internet Res, 2009. **11**(2): p.  
35 e13.  
36  
37  
38 27. Flay, B.R., *Efficacy and effectiveness trials (and other phases of research) in the*  
39 *development of health promotion programs.* Prev Med, 1986. **15**(5): p. 451-74.  
40  
41  
42  
43  
44  
45  
46  
47  
48  
49  
50  
51  
52  
53  
54  
55  
56  
57  
58  
59  
60

- 1  
2  
3  
4 28. Michelmore, L. and P. Hindley, *Help-seeking for suicidal thoughts and self-*  
5  
6 *harm in young people: a systematic review.* Suicide Life Threat Behav, 2012.  
7  
8 **42(5):** p. 507-24.  
9  
10  
11  
12  
13  
14  
15  
16  
17  
18  
19  
20  
21  
22  
23  
24  
25  
26  
27  
28  
29  
30  
31  
32  
33  
34  
35  
36  
37  
38  
39  
40  
41  
42  
43  
44  
45  
46  
47  
48  
49  
50  
51  
52  
53  
54  
55  
56  
57  
58  
59  
60

For peer review only

1  
2  
3  
4  
5  
6  
7  
8  
9  
10  
11  
12  
13  
14  
15  
16  
17  
18  
19  
20  
21  
22  
23  
24  
25  
26  
27  
28  
29  
30  
31  
32  
33  
34  
35  
36  
37  
38  
39  
40  
41  
42  
43  
44  
45  
46  
47  
48  
49

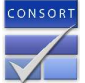

# CONSORT 2010 checklist of information to include when reporting a randomised trial\*

| Section/Topic                    | Item No | Checklist item                                                                                                                                                                              | Reported on page No |
|----------------------------------|---------|---------------------------------------------------------------------------------------------------------------------------------------------------------------------------------------------|---------------------|
| <b>Title and abstract</b>        |         |                                                                                                                                                                                             |                     |
|                                  | 1a      | Identification as a randomised trial in the title                                                                                                                                           | 1                   |
|                                  | 1b      | Structured summary of trial design, methods, results, and conclusions (for specific guidance see CONSORT for abstracts)                                                                     | 2                   |
| <b>Introduction</b>              |         |                                                                                                                                                                                             |                     |
| Background and objectives        | 2a      | Scientific background and explanation of rationale                                                                                                                                          | 5                   |
|                                  | 2b      | Specific objectives or hypotheses                                                                                                                                                           | 7                   |
| <b>Methods</b>                   |         |                                                                                                                                                                                             |                     |
| Trial design                     | 3a      | Description of trial design (such as parallel, factorial) including allocation ratio                                                                                                        | 7-9                 |
|                                  | 3b      | Important changes to methods after trial commencement (such as eligibility criteria), with reasons                                                                                          | na                  |
| Participants                     | 4a      | Eligibility criteria for participants                                                                                                                                                       | 7                   |
|                                  | 4b      | Settings and locations where the data were collected                                                                                                                                        | 7                   |
| Interventions                    | 5       | The interventions for each group with sufficient details to allow replication, including how and when they were actually administered                                                       | 9-10                |
| Outcomes                         | 6a      | Completely defined pre-specified primary and secondary outcome measures, including how and when they were assessed                                                                          | 10-11               |
|                                  | 6b      | Any changes to trial outcomes after the trial commenced, with reasons                                                                                                                       | na                  |
| Sample size                      | 7a      | How sample size was determined                                                                                                                                                              | 6 (ref 8-9)         |
|                                  | 7b      | When applicable, explanation of any interim analyses and stopping guidelines                                                                                                                | na                  |
| <b>Randomisation:</b>            |         |                                                                                                                                                                                             |                     |
| Sequence generation              | 8a      | Method used to generate the random allocation sequence                                                                                                                                      | 6 (ref 8-9)         |
|                                  | 8b      | Type of randomisation; details of any restriction (such as blocking and block size)                                                                                                         | 8                   |
| Allocation concealment mechanism | 9       | Mechanism used to implement the random allocation sequence (such as sequentially numbered containers), describing any steps taken to conceal the sequence until interventions were assigned | 8 (and ref 8-9)     |
| Implementation                   | 10      | Who generated the random allocation sequence, who enrolled participants, and who assigned participants to interventions                                                                     | 8                   |
| Blinding                         | 11a     | If done, who was blinded after assignment to interventions (for example, participants, care providers, those                                                                                | 8                   |

|                                                      |     |                                                                                                                                                   |         |
|------------------------------------------------------|-----|---------------------------------------------------------------------------------------------------------------------------------------------------|---------|
|                                                      |     | assessing outcomes) and how                                                                                                                       |         |
|                                                      | 11b | If relevant, description of the similarity of interventions                                                                                       | -       |
| Statistical methods                                  | 12a | Statistical methods used to compare groups for primary and secondary outcomes                                                                     | 11-13   |
|                                                      | 12b | Methods for additional analyses, such as subgroup analyses and adjusted analyses                                                                  | 11-13   |
| <b>Results</b>                                       |     |                                                                                                                                                   |         |
| Participant flow (a diagram is strongly recommended) | 13a | For each group, the numbers of participants who were randomly assigned, received intended treatment, and were analysed for the primary outcome    | 14      |
|                                                      | 13b | For each group, losses and exclusions after randomisation, together with reasons                                                                  | Ref 8-9 |
| Recruitment                                          | 14a | Dates defining the periods of recruitment and follow-up                                                                                           | Ref 8-9 |
|                                                      | 14b | Why the trial ended or was stopped                                                                                                                | Ref 8-9 |
| Baseline data                                        | 15  | A table showing baseline demographic and clinical characteristics for each group                                                                  | 14      |
| Numbers analysed                                     | 16  | For each group, number of participants (denominator) included in each analysis and whether the analysis was by original assigned groups           | 14      |
| Outcomes and estimation                              | 17a | For each primary and secondary outcome, results for each group, and the estimated effect size and its precision (such as 95% confidence interval) | 14-17   |
|                                                      | 17b | For binary outcomes, presentation of both absolute and relative effect sizes is recommended                                                       |         |
| Ancillary analyses                                   | 18  | Results of any other analyses performed, including subgroup analyses and adjusted analyses, distinguishing pre-specified from exploratory         | 17-19   |
| Harms                                                | 19  | All important harms or unintended effects in each group (for specific guidance see CONSORT for harms)                                             | -       |
| <b>Discussion</b>                                    |     |                                                                                                                                                   |         |
| Limitations                                          | 20  | Trial limitations, addressing sources of potential bias, imprecision, and, if relevant, multiplicity of analyses                                  | 21-22   |
| Generalisability                                     | 21  | Generalisability (external validity, applicability) of the trial findings                                                                         | 20-22   |
| Interpretation                                       | 22  | Interpretation consistent with results, balancing benefits and harms, and considering other relevant evidence                                     | 20-22   |
| <b>Other information</b>                             |     |                                                                                                                                                   |         |
| Registration                                         | 23  | Registration number and name of trial registry                                                                                                    | 1       |
| Protocol                                             | 24  | Where the full trial protocol can be accessed, if available                                                                                       | -       |
| Funding                                              | 25  | Sources of funding and other support (such as supply of drugs), role of funders                                                                   | 24      |

\*We strongly recommend reading this statement in conjunction with the CONSORT 2010 Explanation and Elaboration for important clarifications on all the items. If relevant, we also recommend reading CONSORT extensions for cluster randomised trials, non-inferiority and equivalence trials, non-pharmacological treatments, herbal interventions, and pragmatic trials. Additional extensions are forthcoming: for those and for up to date references relevant to this checklist, see [www.consort-statement.org](http://www.consort-statement.org).



**The effect of a web based depression intervention on suicide ideation. Secondary outcome from a randomised controlled trial in a helpline.**

|                                 |                                                                                                                                                                                                                                                                                                                                                                                                                                                                                                                           |
|---------------------------------|---------------------------------------------------------------------------------------------------------------------------------------------------------------------------------------------------------------------------------------------------------------------------------------------------------------------------------------------------------------------------------------------------------------------------------------------------------------------------------------------------------------------------|
| Journal:                        | <i>BMJ Open</i>                                                                                                                                                                                                                                                                                                                                                                                                                                                                                                           |
| Manuscript ID:                  | bmjopen-2013-002886.R1                                                                                                                                                                                                                                                                                                                                                                                                                                                                                                    |
| Article Type:                   | Research                                                                                                                                                                                                                                                                                                                                                                                                                                                                                                                  |
| Date Submitted by the Author:   | 26-Apr-2013                                                                                                                                                                                                                                                                                                                                                                                                                                                                                                               |
| Complete List of Authors:       | Christensen, Helen; Black Dog Institute, University of New South Wales, School of Medicine<br>Farrer, Lou; Australian National University, Centre for Mental Health Research<br>Batterham, Philip; Australian National University, Centre for Mental Health Research<br>Mackinnon, Andrew; University of Melbourne, Orygen Youth Health<br>Griffiths, Kathleen; Australian National University, Centre for Mental Health Research<br>Donker, Tara; Black Dog Institute, University of New South Wales, School of Medicine |
| <b>Primary Subject Heading</b>: | Public health                                                                                                                                                                                                                                                                                                                                                                                                                                                                                                             |
| Secondary Subject Heading:      | Mental health                                                                                                                                                                                                                                                                                                                                                                                                                                                                                                             |
| Keywords:                       | Suicide & self-harm < PSYCHIATRY, Depression & mood disorders < PSYCHIATRY, Internet, Telephone                                                                                                                                                                                                                                                                                                                                                                                                                           |
|                                 |                                                                                                                                                                                                                                                                                                                                                                                                                                                                                                                           |

SCHOLARONE™  
Manuscripts



**The effect of a web based depression intervention on suicide ideation. Secondary outcome from a randomised controlled trial in a helpline.**

Helen Christensen<sup>1</sup>, Louise Farrer<sup>2</sup>, Philip J Batterham<sup>2</sup>, Andrew Mackinnon<sup>3</sup>,  
Kathleen M Griffiths<sup>2</sup> and Tara Donker<sup>1</sup>

<sup>1</sup>*The Black Dog Institute, University of New South Wales, Sydney, NSW, Australia;*

<sup>2</sup>*Centre for Mental Health Research, Australian National University, Canberra, ACT,*

*Australia; <sup>3</sup>Orygen Youth Health, University of Melbourne, Melbourne, VIC, Australia*

Corresponding author:

Helen Christensen

The Black Dog Institute, University of New South Wales, Hospital Road, Prince of  
Wales Hospital, Randwick 2031, Sydney, NSW, Australia

E: [h.christensen@unsw.edu.au](mailto:h.christensen@unsw.edu.au)

P: +612 9382 9288

F: +61 2 9382 8208

*Key words: Suicide, Depression, Telephone, Internet*

*Word count: 4,076*

**ABSTRACT**

**Objectives:** The effect of web-based interventions for depression on suicide ideation in callers to helplines is not known. The aim of this study was to determine if web-based Cognitive Behaviour Therapy (CBT) with and without telephone support is effective in reducing suicide ideation in callers to a helpline compared to treatment as usual. A secondary aim was to examine the factors that predict change in suicide ideation. Putative predictors included level of baseline depression, suicide behaviour, baseline anxiety and type of intervention.

**Design:** Randomised Controlled Trial

**Setting:** Lifeline, Australia's 24-hour telephone counselling service Participants: 155 callers to a national helpline service with moderate to high psychological distress.

**Interventions:** participants were recruited and randomised to receive either 6 weeks of Internet CBT plus weekly telephone follow-up; Internet CBT only; weekly telephone follow-up only; or a wait-list treatment as usual (TAU) control group.

**Primary and secondary outcome measures:** Suicidal ideation was measured using four items from the 28-item General Health Questionnaire (GHQ-28; [1]). Predictors of change in ideation were tested using logistic regression analysis.

**Results:** Regardless of intervention condition, participants showed significant reductions in suicidal ideation over twelve months ( $p < 0.001$ ). Higher baseline suicidal behaviour decreased the odds of remission of suicidal ideation at post-intervention (OR: 0.409 ( $p < 0.001$ )). However, change in depression over the course of the interventions was associated with improvement in suicide ideation (OR: 1.165,  $p < 0.001$ ).

**Conclusions:** Suicide ideation declines with and without proactive intervention.  
Improvements in depression are associated with the resolution of suicide ideation.  
Specific interventions focussing on suicide ideation should be further investigated.

**TRIAL REGISTRATION:** Controlled-Trials.com ISRCTN93903959.

## ARTICLE SUMMARY

### Article focus:

- To evaluate the effectiveness of a web-based Cognitive Behaviour Therapy intervention on suicide ideation in a helpline.
- To examine predictors of suicide ideation resolution

### Key messages:

- Irrespective of intervention condition, participants' suicidal ideation declined over time at post-test, and six months. Declines in suicidal ideation remained significant at 12 month follow-up
- Suicide ideation reduces significantly more in those individuals who also had resolving depression.
- While CBT internet interventions are significantly more effective in resolving depression symptoms compared to control conditions, these operate no more successfully than current call centre practice in resolving suicide ideation.
- Our findings demonstrate the importance of not excluding suicidal participants from interventions designed to target depression.

### Strengths and limitations of this study:

- The study used a Randomised Controlled Trial.

- The addition of the TAU control condition is a significant improvement over previous trials.
- Because all scores were initially high at baseline, the lower scores on the second occasion of measurement may have been due to reversion to the mean.

For peer review only

## INTRODUCTION

Suicide prevention interventions are delivered every day through helplines and through chat in call centres. In Australia, Lifeline reports that over 50 high risk telephone calls are answered daily [2]. However, despite the load taken by helplines in responding to callers at risk, there has been little investigation of the role of these services in reducing suicide risk, or in reducing risk factors associated with suicide risk, such as depression.

To date, the research evidence from suicide helplines has largely focussed on evaluating interventions using the telephone, and to our knowledge, only one randomised controlled trial (RCT) has been conducted. This study [3] evaluated the effects of two brief telephone psychotherapies in reducing general distress [Solution Focussed Brief Therapy (SFBT) and Common Factors Therapy (CFT)] compared to a waitlist control condition using 85 individuals recruited via a suicide hotline. Outcome measures included the Brief Psychiatric Rating Scale, and the Beck Depression Inventory. Drop out was high in the SFBT condition (50%) compared to the CFT condition (37%) and across both conditions drop out occurred before the first session. Relative to the waitlist control, significant reductions in several measures of depression and anxiety symptoms were found in participants who completed the interventions, with effect sizes estimated in the range of .67 and .93. However, outcomes on suicide specific measures were not reported. A highly cited, although uncontrolled study, used a follow-up design (pre-post outcomes) to evaluate the effectiveness of a helpline for non-suicidal crisis callers (n=1617, of whom 801 provided follow-up data) [4]. Callers' levels of crisis and hopelessness were rated during the calls and found to decrease

1  
2  
3  
4 during the course of the call. In a second study, focussing on 1,085 participants who  
5 were suicidal Gould et al. [5] found that levels of intent to die over the course of a call  
6 decreased and that there were continuing falls in hopelessness and psychological pain  
7 over the continuing weeks.  
8  
9

10  
11  
12  
13 Web-based interventions are now more frequently used in helpline services, and  
14 research of their usefulness is emerging in community settings. Two studies of online e-  
15 health applications targeting either risk factors for suicide (depression) or suicide  
16 ideation were published in 2012. The first was an uncontrolled service evaluation which  
17 found a 30% reduction in suicide ideas [6] over the course of a depression web  
18 program. The second was a randomised controlled trial of an online intervention which  
19 examined the effectiveness and cost effectiveness of an automated six module, six  
20 week, intervention specifically targeting suicide ideation for individuals with mild to  
21 moderate suicidal thoughts. The intervention was based on Cognitive Behaviour  
22 Therapy (CBT), with Dialectical Behaviour Therapy, Problem Solving Therapy and  
23 Mindfulness-Based Cognitive Therapy included. Significant reductions in suicidal  
24 thoughts were found relative to Control condition. The mean incremental cost-  
25 effectiveness ratio (ICER) was estimated to be €34,727 (US \$41,325) for an additional  
26 treatment response, indicating annual cost savings per treatment responder [7].  
27  
28  
29  
30  
31  
32  
33  
34  
35  
36  
37  
38  
39  
40  
41  
42  
43  
44  
45

46 In 2012, we published the results of a randomised controlled trial investigating  
47 the effects of a web application in reducing depression and anxiety in a large helpline  
48 [8, 9]. This trial compared four conditions: a treatment as usual condition (TAU), where  
49 the participant could call the crisis line at any time; a telephone call back service where  
50 the participant was contacted for 10 minutes systematically once a week for six weeks; a  
51  
52  
53  
54  
55  
56  
57  
58  
59  
60

1  
2  
3  
4 CBT internet program for depression combined with a evidence-based depression  
5 information website, and a combined condition which incorporated telephone call back  
6 and the web programs. Both the web programs alone, and the web programs in  
7 combination with the telephone call back, were effective at 12 months in reducing  
8 depression symptoms, relative to TAU. This study also measured suicide ideation, and  
9 in this paper, we report the results using this outcome measure.

10  
11  
12  
13  
14  
15  
16  
17 Suicide ideation is a substantial risk factor for suicide attempt. Theories of  
18 suicide causation point to the importance of depression and hopelessness in leading to  
19 increased levels of suicide ideation and attempts (see [10]). We hypothesised that  
20 suicide ideation would be reduced over time in those conditions which successfully  
21 reduced depression. Accordingly, we first examined the effect of the four interventions  
22 conditions on suicide ideation. For suicide ideation, we hypothesised that the web CBT  
23 intervention focussing on reducing depression—with or without the telephone call  
24 back— would result in significantly greater reduction of suicide ideation than the other  
25 two conditions, which did not include interventions specifically aiming to reduce  
26 depression. We then used logistic regression to explore which factors, in addition to  
27 any effect of the intervention, predicted changes in suicide ideation at post-test. These  
28 factors were baseline suicidality, baseline depression, baseline anxiety, age, gender,  
29 education, workforce participation, and changes in depression and anxiety over the  
30 course of the intervention (pre to post-test).

## 31 32 33 34 35 36 37 38 39 40 41 42 43 44 45 46 47 48 49 50 51 52 **METHOD**

53  
54 Data for this study were collected as part of a randomized controlled trial of the  
55 impact of a Web-based CBT and psychoeducation intervention on depression symptoms  
56  
57  
58  
59  
60

1  
2  
3  
4 [9]. The trial comprised four arms: (i) a Web-based CBT intervention; (ii) a Web-based  
5  
6 CBT intervention delivered in conjunction with a telephone call back; (iii) the proactive  
7  
8 call back telephone line alone, and (iv) TAU, which consisted of the opportunity for the  
9  
10 participant to contact the helpline if needed.

### 11 12 13 **Ethics statement**

14  
15 Ethics approval for the trial was granted by the Australian National University  
16  
17 Human Research Ethics Committee (Protocol no. 2007/12).  
18  
19

### 20 21 22 23 **Participants**

24  
25 Participants were 155 callers to Lifeline, Australia's 24-hour telephone  
26  
27 counselling service, recruited between July 2007 and January 2009. High distress or  
28  
29 acutely suicidal participants were excluded. A total of 910 callers agreed to be screened  
30  
31 by telephone. Of these, 142 (15.6%) were subsequently unable to be contacted, 61 (7%)  
32  
33 were later unwilling to participate, and 337 (37%) did not meet eligibility criteria.  
34  
35 Respondents were not eligible for inclusion in the trial if they (1) scored less than 22 on  
36  
37 the Kessler Psychological Distress Scale [11] (138/337, 41%), a brief screening scale  
38  
39 used clinically and epidemiologically, (2) had, by self-report, a diagnosis of  
40  
41 schizophrenia or bipolar disorder (89, 26%), or (3) did not have Internet access (67,  
42  
43 20.0%). Ineligible participants were offered brochures sent by mail containing  
44  
45 information about the Web intervention used in the trial. Of the 370 people eligible for  
46  
47 inclusion in the trial, 155 completed informed consent procedures and pre-intervention  
48  
49 assessments, and were randomly assigned to the trial conditions. The trial flow is  
50  
51 illustrated in Figure 1.  
52  
53  
54  
55  
56  
57  
58  
59  
60



## Procedure

Following screening and informed consent procedures, pre-intervention data were obtained through a self-report questionnaire mailed to participants. A block randomization procedure was used, with stratification based on site of recruitment and severity of psychological distress at screening. Allocation of participants to trial conditions was conducted independently by a research assistant not involved in the day-to-day running of the trial. Following randomization, all participants were contacted by telephone and were mailed the relevant materials for their allocated condition.

## Intervention and Trial Conditions

The Web-only intervention consisted of Web-based psychoeducation (in week 1 provided by BluePages: [bluepages.anu.edu.au](http://bluepages.anu.edu.au)) combined with Web-based CBT (in weeks 2–6 provided by MoodGYM: [moodgym.anu.edu.au](http://moodgym.anu.edu.au)). BluePages is an educational site that provides information on evidence-based interventions for depression. MoodGYM is a first generation, interactive web application which delivers cognitive behaviour therapy through a series of 5 modules, captures user behaviour and self-report symptoms on validated scales, and offers an online CBT workbook. Both of these Web programs have been shown to reduce depression symptoms in community users [12]. A printed manual containing week-by-week instructions for accessing the Web programs (via a login) was mailed to participants at the start of the trial.

In the Web with telephone call back condition, participants completed the Web intervention and also received a weekly 10-minute telephone call from a Lifeline

1  
2  
3  
4 telephone counsellor. The purpose of these calls was to address any issues associated  
5  
6 with the participants' use of the intervention.  
7  
8

9  
10 In the telephone call back only condition, participants received a weekly 10-minute  
11  
12 telephone call initiated from a telephone counsellor. These scripted calls focused on  
13  
14 various environmental and lifestyle factors associated with depression.  
15

16  
17 In the TAU condition, participants received neither the call back nor Web interventions,  
18  
19 but were free to use the helpline service as needed. Participants in this condition were  
20  
21 wait-listed to receive the Web-only intervention following completion of the 6-month  
22  
23 follow-up.  
24  
25

26  
27 As in the TAU condition, participants in all 3 other conditions were also able to use the  
28  
29 helpline service as needed, which provided usual emergency or support services. Self-  
30  
31 reported contacts with the service were taken at each follow-up occasion for each of the  
32  
33 4 conditions. Any use of this service during the intervention period was additional to the  
34  
35 10-minute telephone calls offered proactively as part of the call back component of the  
36  
37 Telephone call back condition and the Internet plus call back condition.  
38  
39  
40

## 41 42 **Measures**

### 43 44 45 *Suicidal ideation*

46  
47 Suicidal ideation was measured using four items from the 28-item General  
48  
49 Health Questionnaire (GHQ-28; [1]). The four questions measure suicidal ideation,  
50  
51 asking respondents to indicate how they have felt over the last few weeks. The first two  
52  
53 items: 'Have you recently felt that life is not worth living' and 'Have you recently found  
54  
55 yourself wishing you were dead and away from it all' were scored on the 4-point scale:  
56  
57  
58  
59  
60

1  
2  
3  
4 'Not at all', 'No more than usual', 'Rather more than usual' or 'Much more than usual'.  
5  
6 The remaining two items: 'Have you recently had thoughts of the possibility that you  
7  
8 might do away with yourself' and 'Have you recently found that the idea of taking your  
9  
10 own life kept coming into your mind' were scored on the 4-point scale: 'Definitely not',  
11  
12 'I don't think so', 'Has crossed my mind' or 'Definitely has'. Responses were then  
13  
14 categorised in a binary manner, with the negatively-worded response categories (Not at  
15  
16 all, No more than usual, definitely not, and I don't think so) scored with a 0, and the  
17  
18 positively-worded response categories scored with a 1. Binary scores for each item were  
19  
20 summed to provide a total scale score ranging from 0 to 4, with a higher score  
21  
22 indicating higher suicidal ideation. This scoring system is that used for all items and sub  
23  
24 scores of the GHQ-28, which has been validated in Australian populations [13]. The  
25  
26 four suicide items from the GHQ-28 have been used extensively by Goldney and  
27  
28 colleagues to assess suicidal ideation in a number of Australian samples [14-16]. These  
29  
30 items have been validated relative to other well established measures of suicidal intent  
31  
32 and hopelessness [17, 18]. Cronbach Alpha for the 4 items at baseline in the present  
33  
34 sample was 0.90.  
35  
36  
37  
38  
39  
40  
41

#### 42 *Predictor variables*

43  
44 Depression symptoms were measured by the Center for Epidemiologic Studies  
45  
46 Depression Scale (CES-D)[19], a widely used, 20 item scale with strong reliability and  
47  
48 validity [19, 20], with scores ranging from 0 to 60. Anxiety symptoms were assessed  
49  
50 using the 14-item anxiety scale from the Depression, Anxiety and Stress Scales (DASS-  
51  
52 A;[21]. Each of these items is rated on a four-point scale from 0 ("did not apply to me at  
53  
54 all") to 4 ("applied to me most of the time"), with total scores ranging from 0 to 42. The  
55  
56  
57  
58  
59  
60

1  
2  
3  
4 reliability and validity of the DASS-A scale has been demonstrated previously ([22,  
5  
6 23]).  
7

8  
9 Demographic variables including age, gender, educational attainment and  
10 workforce participation were assessed by self-report in the pre-test survey. Educational  
11 attainment was based on two items assessing highest level of education, which were  
12 used to form an estimate of total number of years of education. Workforce participation  
13 was based on an item assessing employment status, with “unemployed” and “not in the  
14 labour force” categorised as non-participation, and employed “full-time” or “part-time”  
15 categorised as participation.  
16  
17  
18  
19  
20  
21  
22  
23  
24  
25

## 26 **Statistical analyses**

27  
28 Differential changes in suicide ideation across the four conditions were assessed  
29 using mixed model repeated measures analysis of variance. Within-person variation was  
30 modeled using an unstructured covariance matrix and degrees of freedom were  
31 estimated using Satterthwaite’s approximation. This model included the fixed effects of  
32 condition, time (pre, post, 6 month, 12 month) and the interaction between condition  
33 and time. The presence of a significant interaction between an active intervention and  
34 the TAU condition over time would indicate a significant reduction in suicidal ideation  
35 for that condition relative to control. Within-condition change in suicidal ideation was  
36 also examined using this model. Mixed models yield an intention-to-treat analysis,  
37 using all available measurement points for each participant under the assumption that  
38 withdrawal data are missing at random. Two participants with missing suicidal ideation  
39 scores at baseline were omitted from analyses. To evaluate whether the scoring of the  
40 suicidal ideation scale influenced the findings, the models were re-estimated using a  
41  
42  
43  
44  
45  
46  
47  
48  
49  
50  
51  
52  
53  
54  
55  
56  
57  
58  
59  
60

1  
2  
3  
4 continuous score of suicidal ideation, assessed at each time point as the sum of  
5  
6 responses to the four ideation items (range 0-12).  
7

8  
9 Logistic regression was then used to examine predictors of suicidal ideation at  
10 post-intervention, defined as a suicidal ideation score of 0. In particular, the hypothesis  
11 was assessed that reduction in depression symptoms from pre- to post-intervention  
12 predicted remission of ideation. Only completers of the post-test assessment were  
13 included in this analysis. A depression symptom change score from pre- to post-  
14 intervention was calculated by subtracting post-intervention CES-D scores from pre-  
15 intervention scores, with positive scores indicating a reduction/improvement in  
16 symptoms. The effect of anxiety symptoms and changes in anxiety were assessed in the  
17 same way. Suicidal ideation scores (ranging from 0 to 4) were coded categorically as  
18 “0” (score  $\geq 1$ , indicating some suicidal ideation) or “1” (score = 0, no ideation). To  
19 control for baseline depression, baseline anxiety, baseline suicidality and intervention  
20 condition, these variables were included in the regression simultaneously with the  
21 depression change score. In addition, age, gender, education and workforce  
22 participation were included in the models due to their potential associations with  
23 suicidal ideation.  
24  
25  
26  
27  
28  
29  
30  
31  
32  
33  
34  
35  
36  
37  
38  
39  
40  
41  
42  
43  
44  
45  
46  
47  
48  
49  
50  
51  
52  
53  
54  
55  
56  
57  
58  
59  
60

## RESULTS

### Descriptives and changes in suicide ideation

Table 1 shows the characteristics of the sample at baseline, with mental health measures for post-intervention also presented. The age range was 19-72, with a median age of 42 years. The majority of participants (57%) had graduated from high school. Most of the participants were female and approximately half were in the work force. Depression and anxiety scores were considerably higher than the cut points for the scales used at both time points, although there were decreases from pre- to post-intervention. Likewise, high rates of suicidality were observed, with 62.7% and 41.5% reporting suicidal ideation at pre- and post-intervention respectively.

**Table 1.** Characteristics of participants

|                                                 | N   | Mean  | SD    |
|-------------------------------------------------|-----|-------|-------|
| Age                                             | 155 | 41.49 | 12.35 |
| Years of education                              | 150 | 13.47 | 2.67  |
| CES-D depression score, pre-intervention        | 152 | 36.25 | 10.22 |
| CES-D depression score, post-intervention       | 107 | 28.68 | 14.40 |
| DASS anxiety score, pre-intervention            | 154 | 13.34 | 8.03  |
| DASS anxiety score, post-intervention           | 107 | 11.45 | 10.16 |
| GHQ suicidal ideation score - pre-intervention  | 153 | 1.73  | 1.64  |
| GHQ suicidal ideation score - post-intervention | 106 | 1.00  | 1.45  |
|                                                 | N   | Count | %     |
| <i>Gender</i>                                   | 155 |       |       |
| Female                                          |     | 127   | 81.9% |
| Male                                            |     | 28    | 18.1% |
| <i>Workforce participation</i>                  | 155 |       |       |
| Participation                                   |     | 72    | 46.5% |
| Non-participation                               |     | 83    | 53.5% |
| <i>Treatment condition</i>                      | 155 |       |       |
| Internet only                                   |     | 38    | 24.5% |
| Internet plus call back                         |     | 45    | 29.0% |
| Telephone call back only                        |     | 37    | 23.9% |

Treatment as usual 35 22.6%

*Mixed models: Effect of intervention type on suicidal ideation*

Suicide ideation declined significantly over the 12 month period ( $F(3, 95.4) = 15.06, p < 0.001$ ). However, differences in change over time between conditions were not significant ( $F(8, 115.8) = 1.13, p = .352$ ). Figure 2 shows the estimated marginal means for suicidal ideation across measurement occasions.

*Within group contrasts*

As can be seen in Table 2, planned contrasts revealed that participants in the call back only and TAU conditions showed significant declines in suicidal ideation from pre- to post-intervention and from pre-intervention to 6 month follow-up. Declines in suicidal ideation from pre-intervention to 12 month follow-up were significant for participants in all conditions in which the difference could be assessed.

**Table 2.** Within group contrast estimates and significance tests for suicidal ideation

| Condition                      | Statistic         | Contrast                              |                                       |                                        |
|--------------------------------|-------------------|---------------------------------------|---------------------------------------|----------------------------------------|
|                                |                   | Pre-intervention to post-intervention | Pre-intervention to 6 month follow-up | Pre-intervention to 12 month follow-up |
| Internet only                  | Contrast estimate | -.54                                  | -.79                                  | -.97                                   |
|                                | Test value        | $t(109.8) = -1.98$                    | $t(101.5) = -2.50$                    | $t(73.2) = -3.65$                      |
|                                | <i>p</i> value    | .050                                  | .016                                  | <.001                                  |
| Internet + telephone call back | Contrast estimate | -.06                                  | -.48                                  | -1.12                                  |
|                                | Test value        | $t(121.3) = -.20$                     | $t(106.2) = -1.45$                    | $t(80.8) = -3.91$                      |
|                                | <i>p</i> value    | .85                                   | .15                                   | <.001                                  |
| Telephone callback only        | Contrast estimate | -.79                                  | -.68                                  | -.68                                   |
|                                | Test value        | $t(105.6) = -3.05$                    | $t(100.0) = -2.22$                    | $t(78.0) = -2.61$                      |

|                    |                   |                    |                    |      |
|--------------------|-------------------|--------------------|--------------------|------|
|                    | <i>p</i> value    | .003               | .029               | .011 |
| Treatment as usual | Contrast estimate | -.80               | -.66               |      |
|                    | Test value        | $t(108.0) = -2.89$ | $t(103.1) = -1.96$ |      |
|                    | <i>p</i> value    | .005               | .053               |      |

### *Between group contrasts*

No significant differences were found between conditions at post-intervention, 6 month follow-up, or 12 month follow-up: Internet only vs. TAU (post-test: Contrast estimate = .26;  $p = .51$ ; 6-month follow-up: Contrast estimate = -.14,  $p = .77$ ); Internet only vs. Telephone call back only (post-test: Contrast estimate = .25;  $p = .51$ ; 6-month follow-up: Contrast estimate = -.11,  $p = .80$ ; 12-month follow-up: Contrast estimate = -.28;  $p = .45$ ); Internet + telephone call back vs. TAU (post-test: Contrast estimate = .74;  $p = .07$ ; 6-month follow-up: Contrast estimate = .17,  $p = .72$ ); Internet + telephone call back vs Telephone call back only (post-test: Contrast estimate = .73;  $p = .07$ ; 6-month follow-up: Contrast estimate = .19,  $p = .67$ ; 12-month follow-up: Contrast estimate = -.44;  $p = .26$ ); Telephone call back only vs TAU (post-test: Contrast estimate = .01;  $p = .99$ ; 6-month follow-up: Contrast estimate = -.02,  $p = .96$ ); Internet only vs Internet + telephone call back (post-test: Contrast estimate = -.48;  $p = .24$ ; 6-month follow-up: Contrast estimate = -.31,  $p = .51$ ; 12-month follow-up: Contrast estimate = .16;  $p = .69$ ). To test whether the lack of between-group effects were related to scaling effects of the suicidal ideation measure, the models were re-estimated using a continuous score for suicidal ideation. As with the original analysis, there was significant reduction over time in suicidal ideation scores ( $F(3, 94.5) = 14.08, p < 0.001$ ). Again, there was no significant interaction between condition and time ( $F(8, 89.9) = 0.81, p = 0.598$ ),



1  
2  
3  
4 indicating no significant difference in change of suicidal ideation scores between the  
5  
6 intervention groups across the study period.  
7  
8

9  
10  
11 *Effect sizes for suicidal ideation*  
12  
13

14  
15 At post-intervention, effect sizes were 0.10 (95% CI: -0.43 to 0.64) for the  
16 Internet only condition and 0.04 (95% CI: -0.54 to 0.62) for the Internet plus call back  
17 condition, compared to the TAU condition. Compared to call back only, effect sizes  
18 were 0.28 (95% CI: -0.24 to 0.79) for the Internet only condition and 0.41 (95% CI: -  
19 0.15 to 0.98) for the Internet plus call back condition. At 6 month follow-up, effect sizes  
20 were 0.36 (95% CI: -0.24 to 0.96) for the Internet only condition and 0.20 (95% CI: -  
21 0.42 to 0.81) for the Internet plus call back condition, compared to the TAU condition.  
22 Compared to telephone call back only, effect sizes were 0.08 (95% CI: -0.48 to 0.63) for  
23 the Internet only condition and 0.07 (95% CI: -0.51 to 0.65) for the Internet plus  
24 telephone call back condition. At 12 month follow-up, effect sizes were 0.28 (95% CI: -  
25 0.33 to 0.89) for the Internet only condition and 0.45 (95% CI: -0.24 to 1.13) for the  
26 Internet plus call back condition, compared with the call back only condition.  
27  
28  
29  
30  
31  
32  
33  
34  
35  
36  
37  
38  
39  
40  
41  
42  
43

44 *Predictors of suicide ideation*  
45

46 A logistic regression analysis was designed to measure predictors of suicide  
47 ideation change taking account of intervention condition. Consistent with findings  
48 reported above, compared to baseline (M:1.73; SD: 1.64; N=153) suicidal ideation  
49 significantly decreased in the whole sample at post-test (M:1.00; SD:1.45; N=106), 6-  
50 month (M:0.99; SD:1.54; N=91) and 12-month follow-up (M:0.66; SD:1.27; N=56).  
51  
52  
53  
54  
55  
56  
57  
58  
59  
60

1  
2  
3  
4 However, as there was no significant interaction effect between condition and time on  
5  
6 suicidal ideation, this interaction was not retained in the model. Table 3 shows the  
7  
8 results for the model with interactions excluded. As would be expected, higher levels of  
9  
10 suicide ideation at baseline were associated with significantly reduced odds of absence  
11  
12 of suicide ideation at post-test. Neither baseline depression nor anxiety was significantly  
13  
14 associated with no suicide ideation at post-test. There were also no significant effects of  
15  
16 any of the demographic characteristics. However, a greater improvement in depression  
17  
18 symptoms from pre- to post-intervention was associated with increased odds of no  
19  
20 suicidal ideation at post-intervention. At baseline, the majority of participants (n=93;  
21  
22 62.0%) reported both depressive symptoms and suicidal ideation. This proportion  
23  
24 decreased at all time-points following the interventions [post-test: 44 (41.5%); 6-months  
25  
26 follow-up: 30 (33.0%); 12-months follow-up: 13 (23.2%)]. Based on McNemar's tests  
27  
28 using completers of each assessment, these decreases were significant at all three time  
29  
30 points ( $P = 0.005$ ,  $P < 0.001$  and  $P = 0.002$  at post, 6-months and 12-months  
31  
32 respectively). There was no significant difference in the proportion of participants with  
33  
34 depression but no suicidal ideation, except at 12-month follow-up [baseline: n=53  
35  
36 (35.3%); post-test: n=42 (39.6%), 6-months follow-up: n=28 (30.8%); 12-months  
37  
38 follow-up: 18 (32.1%);  $P = 1.00$ ;  $P = 0.15$  and  $P = 0.019$  at post, 6-months and 12-  
39  
40 months respectively).  
41  
42  
43  
44  
45  
46  
47

48 **Table 3.** Logistic regression analyses of remission of suicidal ideations (completers  
49  
50 only)  
51

|  | OR | p | 95% CI |       |
|--|----|---|--------|-------|
|  |    |   | Lower  | Upper |
|  |    |   |        |       |

---

|                                  |       |        |       |        |
|----------------------------------|-------|--------|-------|--------|
| Suicidality score at baseline    | 0.409 | <0.001 | 0.249 | 0.671  |
| <i>Condition</i>                 | --    | 0.239  |       |        |
| TAU                              | 1.000 | --     |       |        |
| Internet only                    | 1.408 | 0.699  | 0.248 | 8.001  |
| Internet + telephone call back   | 0.323 | 0.234  | 0.050 | 2.082  |
| Telephone call back only         | 2.442 | 0.284  | 0.476 | 12.512 |
| Baseline depression score        | 0.926 | 0.081  | 0.849 | 1.010  |
| Depression change score          | 1.165 | <0.001 | 1.070 | 1.267  |
| Baseline anxiety score           | 1.066 | 0.256  | 0.955 | 1.190  |
| Anxiety change score             | 0.986 | 0.836  | 0.859 | 1.130  |
| Gender: F vs M                   | 0.992 | 0.993  | 0.174 | 5.646  |
| Age                              | 1.051 | 0.054  | 0.999 | 1.106  |
| Years of education               | 0.897 | 0.438  | 0.681 | 1.181  |
| Not in labour force vs. employed | 0.915 | 0.899  | 0.233 | 3.592  |

---

\*only main effects included.

## DISCUSSION

This was the first study to examine the effect of online interventions on suicide ideation in a helpline using a randomised controlled trial design. In contrast to our hypothesis, results from our study indicated that irrespective of intervention condition, participants' suicidal ideation declined over time at post-test, and six months. Declines were slower to become significant for those randomised to the Internet plus call back condition. For all groups, declines in suicidal ideation remained significant at 12 month follow-up. Although there were small effects at post-test and medium effect sizes at follow-up among the intervention conditions, there were no consistent overall effects

1  
2  
3  
4 for condition. Participants having higher baseline suicide scores were more likely to  
5  
6 continue experiencing suicidal ideation at post-intervention, while those with greater  
7  
8 improvements in depression symptoms were less likely to experience suicide ideation at  
9  
10 post-intervention.  
11

12  
13 Several studies have shown reductions of suicide ideation in uncontrolled pre  
14  
15 post trials of counselling or internet CBT (e.g.,[5, 6]). This is, to our knowledge the  
16  
17 first randomised controlled trial of an intervention in a helpline, comparing a number of  
18  
19 active interventions to treatment as usual. The study is also unique in that it examined  
20  
21 predictors of ideation change, taking account of the effect of intervention. As previously  
22  
23 reported for this study [9], web based CBT, and web CBT with counsellor call back  
24  
25 significantly reduced depression symptoms relative to TAU. These findings indicate  
26  
27 that suicide ideation did not follow the same pattern as depression in response to the  
28  
29 intervention, and, more generally, that suicide ideation was not strictly tethered to  
30  
31 depression. Nevertheless, the regression analysis found that taking account of  
32  
33 intervention type, changes in depression did predict later lower levels of ideation,  
34  
35 suggesting that depression change is an important albeit not necessarily the only factor  
36  
37 in reducing ideation. We interpret these findings to suggest that change in depression, in  
38  
39 whatever way it is brought about, is a contributing variable to reduction in suicide  
40  
41 ideation. A second explanation for the findings is that changes in suicide ideation and  
42  
43 changes in depression follow different time trajectories, with ideation resolving faster  
44  
45 than depression. The two constructs are likely to be interactive, with ideation reduction  
46  
47 assisting in lowering depression symptoms over time. Hopelessness may mediate both  
48  
49 depression and ideation but may influence each within different time frames [24].  
50  
51 Interestingly, a recent meta-analysis [25] has examined the effects of face-to-face  
52  
53  
54  
55  
56  
57  
58  
59  
60

1  
2  
3  
4 psychotherapy for adult depression on suicidality. It found a non-significant effect of  
5  
6 psychotherapy in the reduction of suicidality but a significant effect for depression,  
7  
8 consistent with concept that depression and suicidality are not strictly tethered.  
9

10  
11 Suicide ideation resolved in our TAU condition, consistent with the notion that ideation  
12  
13 is responsive to events or processes that occurred with the passage of time for  
14  
15 participants with access to “usual services”. We do know that at 6 weeks TAU  
16  
17 participants were more likely to make more calls to the helpline service compared to  
18  
19 participants in the Internet alone condition, but not to the other conditions. Eighty one  
20  
21 percent of TAU participants reported that they made at least one call, and approximately  
22  
23 55% had made 3 or more calls. These calls may have contributed to the suicide  
24  
25 resolution in this and the other two conditions. However, these spontaneous calls were  
26  
27 unlikely to be responsible for the differences in depression resolution, given that the  
28  
29 Internet alone group also showed drops in depression levels.  
30  
31

32  
33 The finding that all groups showed suicide resolution, however, does not rule  
34  
35 out the possibility that specific psychological or proactive interventions will support  
36  
37 faster resolution of suicide ideation symptoms than the interventions reported here.  
38  
39 Indeed the intervention developed by Van Spijker et al. [7] may be one of these specific  
40  
41 interventions.  
42  
43

#### 44 45 46 *Limitations of the study* 47

48  
49  
50 One explanation of the failure to find an effect of intervention type on suicide  
51  
52 ideation outcomes is that these findings are due to regression to the mean. Because all  
53  
54 scores were initially high at baseline, scores would be expected to revert to the mean on  
55  
56  
57  
58  
59  
60

1  
2  
3  
4 the second occasion of measurement. Intervention completion rates were lower in our  
5  
6 study relative to some other trials of web-based treatments for depression [26] but not of  
7  
8 other telephone-based services [3]. The reasons for this are unclear. The current trial  
9  
10 was a true effectiveness trial employing a volunteer workforce for recruitment and call  
11  
12 back, and hence might be expected to be associated with greater recruitment and  
13  
14 adherence problems relative to the more controlled environment of an efficacy study  
15  
16 [27]. Also, the interventions were short, delivered by non-health professionals, and may  
17  
18 have constituted the only service received. The measure used to assess suicidality used  
19  
20 items that categorised outcomes dichotomously, and then summed responses, as per  
21  
22 scale score recommendations. Moreover, these scores were then further dichotomised in  
23  
24 the regression analysis. This is essentially a conservative treatment of data. We did  
25  
26 investigate whether other continuous scoring methods might reveal intervention effects.  
27  
28 These data did not yield any relationships. The generalisability of the findings to  
29  
30 severely suicidal individuals is also limited, given acutely suicidal or highly distressed  
31  
32 callers were specifically not invited to participate. We had relatively low success in  
33  
34 recruiting participants to the trial, a finding that reflects the nature of effectiveness trials  
35  
36 using targeted samples such as ours [27] and where a mismatch occurs between the  
37  
38 expectation of phoning a crisis centre and being 'diverted' to another program. Finally,  
39  
40 we were not able to analyse the influence of other psychological characteristics on  
41  
42 treatment outcome, such as hopelessness, or support from family, which might affect  
43  
44 both depression and suicidal ideation levels. These measures were not included in our  
45  
46 study.  
47  
48  
49  
50  
51

#### 52 53 *Future research*

54  
55  
56  
57  
58  
59  
60

1  
2  
3  
4 Replications of this trial need to be performed to establish consistency of  
5  
6 research findings. Furthermore, examination of mediators of change such as  
7  
8 hopelessness in larger samples would add significantly to our knowledge of which  
9  
10 components of therapy are necessary for reduction of suicide ideation. Given the  
11  
12 absence of differences between conditions, it may be that one or more components  
13  
14 present in each treatment arm (e.g., giving hope, or participating in research) are  
15  
16 responsible for change in outcome. Identifying these components and altering their  
17  
18 presence by intensifying or omitting them in a new intervention trial would add to our  
19  
20 current knowledge mechanisms of change. Investigation of the causes of reductions in  
21  
22 suicide ideation is warranted.  
23  
24  
25  
26

### 27 *Clinical implications*

28  
29  
30 Despite the limitations, the current study clearly demonstrated that suicide  
31  
32 ideation declined irrespective of intervention, telephone counsellor contact or wait-list.  
33  
34 The addition of the TAU control condition is a significant improvement over previous  
35  
36 trials. The study demonstrated that, while CBT internet interventions are significantly  
37  
38 more effective in resolving depression symptoms than control conditions, these operate  
39  
40 no more successfully than current call centre practice in resolving suicide ideation.  
41  
42 Suicide ideation reduces significantly more effectively in those individuals who also  
43  
44 have resolving depression. The majority of people experiencing suicidal ideation do not  
45  
46 receive mental health treatment [28]. Internet-based or telephone based interventions  
47  
48 have the advantage that they can be easily accessed by large numbers of people, on an  
49  
50 anonymous basis. In line with Watts et al. [6], our findings demonstrate the importance  
51  
52 of not excluding suicidal participants from interventions designed to target depression.  
53  
54  
55  
56  
57  
58  
59  
60

**Figure legends:****Figure 1:** Trial Flow Diagram**Figure 2:** Estimated marginal means for suicidal ideation across measurement occasions.**ACKNOWLEDGEMENTS**

Nicole Burgess coordinated and conducted data collection for the trial. Dawn O'Neil was involved in obtaining funding for the trial and coordinating Lifeline Australia's collaboration with the ANU. Assoc Prof Richard O'Kearney was a member of LF's PhD supervisory panel. Trevor Carlyon was also involved in coordinating Lifeline staff and volunteer involvement in the trial and supported Nicole in her role. The e hub team supported the trial implementation. We acknowledge the contributions of the Lifeline counselors who participated in this trial.

**COMPETING INTERESTS**

None.

**FUNDING**



1  
2  
3  
4 Australian Research Council Linkage Grant (LP0667970), 2006, 3 years, \$279,325  
5  
6 (Christensen, Griffiths, Mackinnon, Smith), Internet technologies, health informatics,  
7  
8 and statistical models, and new delivery platforms in call centres (CIA).  
9

10  
11 HC and PB were supported by NHMRC 525411 and NHMRC Early Career Fellowship  
12  
13 1035262. KMG is supported by NHMRC Fellowship No. 525413.  
14

### 15 16 17 **CONTRIBUTORSHIP**

18  
19 HC, KG, AJM conceived the study, LF, HC, KG, AJM designed the study, HC, TD  
20  
21 drafted the initial manuscript, LF, PB, AJM prepared and cleaned the data and  
22  
23 conducted initial data analysis. All authors contributed to revised drafts.  
24  
25  
26  
27

### 28 **DATA SHARING**

29  
30 The data from this study are available through email to Dr Philip Batterham  
31  
32 p.batterhan@anu.edu.au  
33  
34  
35  
36

### 37 **REFERENCE LIST**

- 38  
39  
40  
41  
42 1. Goldberg D and V Hillier. A scaled version of the General Health  
43  
44 Questionnaire. *Psycholog Med* 1979; **9**:139-145.  
45  
46 2. Lifeline Australia, Lifeline Australia Annual Report 2009-2010, 2010, Lifeline  
47  
48 Australia Ltd: Canberra.  
49  
50 3. Rhee W et al. Efficacy of brief telephone psychotherapy with callers to a suicide  
51  
52 hotline. *Suicide Life Threat Beh* 2005; **35**:317-28.  
53  
54  
55  
56  
57  
58  
59  
60

- 1  
2  
3  
4 4. Kalafat J et al. An evaluation of crisis hotline outcomes. Part 1: Nonsuicidal  
5 crisis callers. *Suicide Life Threat Behav* 2007; **37**: 322-37.
- 6  
7  
8 5. Gould MS et al. An evaluation of crisis hotline outcomes. Part 2: Suicidal  
9 callers. *Suicide Life Threat Behav* 2007; **37**: 338-52.
- 10  
11  
12 6. Watts S et al. A clinical audit of changes in suicide ideas with internet treatment  
13 for depression. *BMJ Open* 2012; **2**:e001558.
- 14  
15  
16 7. van Spijker BA, van Straten A, Kerkhof AJ. The effectiveness of a web-based  
17 self-help intervention to reduce suicidal thoughts: a randomized controlled trial.  
18 *Trials* 2010; **11**: 25.
- 19  
20  
21 8. Farrer, L., et al.. Internet-based CBT for depression with and without telephone  
22 tracking in a national helpline: randomised controlled trial. *PLoS One* 2011; **6**:  
23 e28099.
- 24  
25  
26 9. Farrer L et al. Web-based cognitive behavior therapy for depression with and  
27 without telephone tracking in a national helpline: secondary outcomes from a  
28 randomized controlled trial. *J Med Internet Res* 2012; **14**: e68.
- 29  
30  
31 10. Nock MK et al. Cross-national analysis of the associations among mental  
32 disorders and suicidal behavior: findings from the WHO World Mental Health  
33 Surveys. *PLoS Med* 2009; **6**:e1000123.
- 34  
35  
36 11. Andrews G, Slade T. Interpreting scores on the Kessler Psychological Distress  
37 Scale (K10). *Aust N Z J Public Health* 2001; **25**: 494-7.
- 38  
39  
40 12. Christensen H, Griffiths KM, Jorm AF. Delivering interventions for depression  
41 by using the internet: randomised controlled trial. *BMJ* 2004; **328**: 265.
- 42  
43  
44  
45  
46  
47  
48  
49  
50  
51  
52  
53  
54  
55  
56  
57  
58  
59  
60

- 1
- 2
- 3
- 4 13. Tennant C. The general health questionnaire: a valid index of psychological
- 5 impairment in Australian populations. *Medical Journal of Australia* 1977; **2**:392-
- 6 394.
- 7
- 8
- 9
- 10 14. Goldney R., et al. Suicidal ideation: its enduring nature and associated
- 11 morbidity. *Acta Psychiatr Scand* 1991; **83**: 115-20.
- 12
- 13 15. Goldney R et al. Suicidal ideation in a random community sample: attributable
- 14 risk due to depression and psychosocial and traumatic events. *Australian and NZ*
- 15 *J Psychiat* 2000; **34**: 98-106.
- 16
- 17 16. Goldney R et al. Anger, suicidal ideation, and attempted suicide: a prospective
- 18 study. *Comprehen Psychiat* 1997; **38**: 264-8.
- 19
- 20 17. Goldney R et al. Suicidal ideation in a young adult population. *Acta Psychiatr*
- 21 *Scandin* 1989; **79**: 481-489.
- 22
- 23 18. Watson D et al. The measurement of suicidal ideation. *Crisis* 2001; **22**: 12-14.
- 24
- 25 19. Radloff LS. The CES-D scale: A self-report depression scale for research in the
- 26 general population. *Applied Psycholog Measurem* 1977; **1**:385-401.
- 27
- 28 20. Roberts RE, Vernon SW. The Center for Epidemiologic Studies Depression
- 29 Scale: It's use in a community sample. *Am J Psychiat* 1983; **140**: 41-46.
- 30
- 31 21. Lovibond SH, Lovibond PF. Manual for the Depression Anxiety Stress Scales.
- 32 Sydney: Psychology Foundation 2<sup>nd</sup> Edition. 1995.
- 33
- 34 22. Antony MMB et al. Psychometric properties of the 42-item and 21-item versions
- 35 of the Depression Anxiety Stress Scales (DASS) in clinical groups and a
- 36 community sample. *Psycholog Assess* 1998; **10**: 176-181.
- 37
- 38
- 39
- 40
- 41
- 42
- 43
- 44
- 45
- 46
- 47
- 48
- 49
- 50
- 51
- 52
- 53
- 54
- 55
- 56
- 57
- 58
- 59
- 60

- 1
- 2
- 3
- 4 23. Lovibond SaLP. The structure of negative emotional states: Comparison of the
- 5 Depression Anxiety Stress Scales (DASS) with the Beck Depression and
- 6 Anxiety Inventories. *Behav Res Ther* 1995; **33**: 8.
- 7
- 8
- 9
- 10 24. Thompson EA et al. The mediating roles of anxiety depression, and
- 11 hopelessness on adolescent suicidal behaviors. *Suicide Life Threat Behav* 2005;
- 12 **35**: 14-34.
- 13
- 14
- 15 25. Cuijpers P., et al. The effects of psychotherapy for adult depression on
- 16 suicidality and hopelessness: a systematic review and meta-analysis. *J Affect*
- 17 *Disord* 2013; **144**: 183-90.
- 18
- 19
- 20 26. Christensen H, Griffiths KM, and Farrer L. Adherence in internet interventions
- 21 for anxiety and depression. *J Med Internet Res* 2009; **11**: e13.
- 22
- 23
- 24 27. Flay BR. Efficacy and effectiveness trials (and other phases of research) in the
- 25 development of health promotion programs. *Prev Med* 1986; **15**: 451-74.
- 26
- 27
- 28 28. Michelmore L, Hindley P. Help-seeking for suicidal thoughts and self-harm in
- 29 young people: a systematic review. *Suicide Life Threat Behav* 2012; **42**: 507-24.
- 30
- 31
- 32
- 33
- 34
- 35
- 36
- 37
- 38
- 39
- 40
- 41
- 42
- 43
- 44
- 45
- 46
- 47
- 48
- 49
- 50
- 51
- 52
- 53
- 54
- 55
- 56
- 57
- 58
- 59
- 60



# CONSORT 2010 checklist of information to include when reporting a randomised trial\*

| Section/Topic                    | Item No | Checklist item                                                                                                                                                                              | Reported on page No |
|----------------------------------|---------|---------------------------------------------------------------------------------------------------------------------------------------------------------------------------------------------|---------------------|
| <b>Title and abstract</b>        |         |                                                                                                                                                                                             |                     |
|                                  | 1a      | Identification as a randomised trial in the title                                                                                                                                           | 1                   |
|                                  | 1b      | Structured summary of trial design, methods, results, and conclusions (for specific guidance see CONSORT for abstracts)                                                                     | 2                   |
| <b>Introduction</b>              |         |                                                                                                                                                                                             |                     |
| Background and objectives        | 2a      | Scientific background and explanation of rationale                                                                                                                                          | 5                   |
|                                  | 2b      | Specific objectives or hypotheses                                                                                                                                                           | 7                   |
| <b>Methods</b>                   |         |                                                                                                                                                                                             |                     |
| Trial design                     | 3a      | Description of trial design (such as parallel, factorial) including allocation ratio                                                                                                        | 7-9                 |
|                                  | 3b      | Important changes to methods after trial commencement (such as eligibility criteria), with reasons                                                                                          | na                  |
| Participants                     | 4a      | Eligibility criteria for participants                                                                                                                                                       | 7                   |
|                                  | 4b      | Settings and locations where the data were collected                                                                                                                                        | 7                   |
| Interventions                    | 5       | The interventions for each group with sufficient details to allow replication, including how and when they were actually administered                                                       | 9-10                |
| Outcomes                         | 6a      | Completely defined pre-specified primary and secondary outcome measures, including how and when they were assessed                                                                          | 10-11               |
|                                  | 6b      | Any changes to trial outcomes after the trial commenced, with reasons                                                                                                                       | na                  |
| Sample size                      | 7a      | How sample size was determined                                                                                                                                                              | 6 (ref 8-9)         |
|                                  | 7b      | When applicable, explanation of any interim analyses and stopping guidelines                                                                                                                | na                  |
| <b>Randomisation:</b>            |         |                                                                                                                                                                                             |                     |
| Sequence generation              | 8a      | Method used to generate the random allocation sequence                                                                                                                                      | 6 (ref 8-9)         |
|                                  | 8b      | Type of randomisation; details of any restriction (such as blocking and block size)                                                                                                         | 8                   |
| Allocation concealment mechanism | 9       | Mechanism used to implement the random allocation sequence (such as sequentially numbered containers), describing any steps taken to conceal the sequence until interventions were assigned | 8 (and ref 8-9)     |
| Implementation                   | 10      | Who generated the random allocation sequence, who enrolled participants, and who assigned participants to interventions                                                                     | 8                   |
| Blinding                         | 11a     | If done, who was blinded after assignment to interventions (for example, participants, care providers, those                                                                                | 8                   |

|                                                      |     |                                                                                                                                                   |         |
|------------------------------------------------------|-----|---------------------------------------------------------------------------------------------------------------------------------------------------|---------|
|                                                      |     | assessing outcomes) and how                                                                                                                       |         |
|                                                      | 11b | If relevant, description of the similarity of interventions                                                                                       | -       |
| Statistical methods                                  | 12a | Statistical methods used to compare groups for primary and secondary outcomes                                                                     | 11-13   |
|                                                      | 12b | Methods for additional analyses, such as subgroup analyses and adjusted analyses                                                                  | 11-13   |
| <b>Results</b>                                       |     |                                                                                                                                                   |         |
| Participant flow (a diagram is strongly recommended) | 13a | For each group, the numbers of participants who were randomly assigned, received intended treatment, and were analysed for the primary outcome    | 14      |
|                                                      | 13b | For each group, losses and exclusions after randomisation, together with reasons                                                                  | Ref 8-9 |
| Recruitment                                          | 14a | Dates defining the periods of recruitment and follow-up                                                                                           | Ref 8-9 |
|                                                      | 14b | Why the trial ended or was stopped                                                                                                                | Ref 8-9 |
| Baseline data                                        | 15  | A table showing baseline demographic and clinical characteristics for each group                                                                  | 14      |
| Numbers analysed                                     | 16  | For each group, number of participants (denominator) included in each analysis and whether the analysis was by original assigned groups           | 14      |
| Outcomes and estimation                              | 17a | For each primary and secondary outcome, results for each group, and the estimated effect size and its precision (such as 95% confidence interval) | 14-17   |
|                                                      | 17b | For binary outcomes, presentation of both absolute and relative effect sizes is recommended                                                       |         |
| Ancillary analyses                                   | 18  | Results of any other analyses performed, including subgroup analyses and adjusted analyses, distinguishing pre-specified from exploratory         | 17-19   |
| Harms                                                | 19  | All important harms or unintended effects in each group (for specific guidance see CONSORT for harms)                                             | -       |
| <b>Discussion</b>                                    |     |                                                                                                                                                   |         |
| Limitations                                          | 20  | Trial limitations, addressing sources of potential bias, imprecision, and, if relevant, multiplicity of analyses                                  | 21-22   |
| Generalisability                                     | 21  | Generalisability (external validity, applicability) of the trial findings                                                                         | 20-22   |
| Interpretation                                       | 22  | Interpretation consistent with results, balancing benefits and harms, and considering other relevant evidence                                     | 20-22   |
| <b>Other information</b>                             |     |                                                                                                                                                   |         |
| Registration                                         | 23  | Registration number and name of trial registry                                                                                                    | 1       |
| Protocol                                             | 24  | Where the full trial protocol can be accessed, if available                                                                                       | -       |
| Funding                                              | 25  | Sources of funding and other support (such as supply of drugs), role of funders                                                                   | 24      |

\*We strongly recommend reading this statement in conjunction with the CONSORT 2010 Explanation and Elaboration for important clarifications on all the items. If relevant, we also recommend reading CONSORT extensions for cluster randomised trials, non-inferiority and equivalence trials, non-pharmacological treatments, herbal interventions, and pragmatic trials. Additional extensions are forthcoming: for those and for up to date references relevant to this checklist, see [www.consort-statement.org](http://www.consort-statement.org).

1  
2  
3  
4 **The effect of a web based depression intervention on suicide ideation. Secondary**  
5  
6 **outcome from a randomised controlled trial in a helpline.**  
7  
8  
9

10 Helen Christensen<sup>1</sup>, Louise Farrer<sup>2</sup>, Philip J Batterham<sup>2</sup>, Andrew Mackinnon<sup>3</sup>,  
11  
12 Kathleen M Griffiths<sup>2</sup> and Tara Donker<sup>1</sup>  
13  
14

15  
16  
17 <sup>1</sup>*The Black Dog Institute, University of New South Wales, Sydney, NSW, Australia;*

18  
19 <sup>2</sup>*Centre for Mental Health Research, Australian National University, Canberra, ACT,*  
20  
21 *Australia;* <sup>3</sup>*Orygen Youth Health, University of Melbourne, Melbourne, VIC, Australia*  
22  
23

24  
25  
26 Corresponding author:  
27

28 Helen Christensen  
29

30 The Black Dog Institute, University of New South Wales, Hospital Road, Prince of  
31  
32 Wales Hospital, Randwick 2031, Sydney, NSW, Australia  
33  
34

35 E: h.christensen@unsw.edu.au  
36

37 P: +612 9382 9288  
38

39 F: +61 2 9382 8208  
40  
41

42  
43 *Key words: Suicide, Depression, Telephone, Internet*  
44

45 *Word count: 4,076*  
46  
47  
48  
49  
50  
51  
52  
53  
54  
55  
56  
57  
58  
59  
60

## ABSTRACT

**Objectives:** The effect of web-based interventions for depression on suicide ideation in callers to helplines is not known. The aim of this study was to determine if web-based Cognitive Behaviour Therapy (CBT) with and without telephone support is effective in reducing suicide ideation in callers to a helpline compared to treatment as usual. A secondary aim was to examine the factors that predict change in suicide ideation. Putative predictors included level of baseline depression, suicide behaviour, baseline anxiety and type of intervention.

**Design:** Randomised Controlled Trial

**Setting:** Lifeline, Australia's 24-hour telephone counselling service Participants: 155 callers to a national helpline service with moderate to high psychological distress.

**Interventions:** participants were recruited and randomised to receive either 6 weeks of Internet CBT plus weekly telephone follow-up; Internet CBT only; weekly telephone follow-up only; or a wait-list treatment as usual (TAU) control group.

**Primary and secondary outcome measures:** Suicidal ideation was measured using four items from the 28-item General Health Questionnaire (GHQ-28; [1]. Predictors of change in ideation were tested using logistic regression analysis.

**Results:** Regardless of intervention condition, participants showed significant reductions in suicidal ideation over twelve months ( $p < 0.001$ ). Higher baseline suicidal behaviour decreased the odds of remission of suicidal ideation at post-intervention (OR: 0.409 ( $p < 0.001$ )). However, change in depression over the course of the interventions was associated with improvement in suicide ideation (OR: 1.165,  $p < 0.001$ ).



1  
2  
3  
4 **Conclusions:** Suicide ideation declines with and without proactive intervention.  
5  
6 Improvements in depression are associated with the resolution of suicide ideation.  
7  
8 Specific interventions focussing on suicide ideation should be further investigated.  
9

10 **TRIAL REGISTRATION:** Controlled-Trials.com ISRCTN93903959.  
11

## 12 13 14 15 **ARTICLE SUMMARY**

### 16 17 **Article focus:**

- 18 • To evaluate the effectiveness of a web-based Cognitive Behaviour Therapy  
19 intervention on suicide ideation in a helpline.  
20  
21
- 22 • To examine predictors of suicide ideation resolution  
23  
24  
25

### 26 27 **Key messages:**

- 28 • Irrespective of intervention condition, participants' suicidal ideation declined  
29 over time at post-test, and six months. Declines in suicidal ideation remained  
30 significant at 12 month follow-up  
31  
32
- 33 • Suicide ideation reduces significantly more in those individuals who also had  
34 resolving depression.  
35  
36
- 37 • While CBT internet interventions are significantly more effective in resolving  
38 depression symptoms compared to control conditions, these operate no more  
39 successfully than current call centre practice in resolving suicide ideation.  
40  
41
- 42 • Our findings demonstrate the importance of not excluding suicidal participants  
43 from interventions designed to target depression.  
44  
45  
46  
47  
48  
49

### 50 51 **Strengths and limitations of this study:**

- 52 • The study used a Randomised Controlled Trial.  
53  
54  
55  
56  
57  
58  
59  
60

- The addition of the TAU control condition is a significant improvement over previous trials.
- Because all scores were initially high at baseline, the lower scores on the second occasion of measurement may have been due to reversion to the mean.

For peer review only

## INTRODUCTION

Suicide prevention interventions are delivered every day through helplines and through chat in call centres. In Australia, Lifeline reports that over 50 high risk telephone calls are answered daily [2]. However, despite the load taken by helplines in responding to callers at risk, there has been little investigation of the role of these services in reducing suicide risk, or in reducing risk factors associated with suicide risk, such as depression.

To date, the research evidence from suicide helplines has largely focussed on evaluating interventions using the telephone, and to our knowledge, only one randomised controlled trial (RCT) has been conducted. This study [3] evaluated the effects of two brief telephone psychotherapies in reducing general distress [Solution Focussed Brief Therapy (SFBT) and Common Factors Therapy (CFT)] compared to a waitlist control condition using 85 individuals recruited via a suicide hotline. Outcome measures included the Brief Psychiatric Rating Scale, and the Beck Depression Inventory. Drop out was high in the SFBT condition (50%) compared to the CFT condition (37%) and across both conditions drop out occurred before the first session. Relative to the waitlist control, significant reductions in several measures of depression and anxiety symptoms were found in participants who completed the interventions, with effect sizes estimated in the range of .67 and .93. However, outcomes on suicide specific measures were not reported. A highly cited, although uncontrolled study, used a follow-up design (pre-post outcomes) to evaluate the effectiveness of a helpline for non-suicidal crisis callers (n=1617, of whom 801 provided follow-up data) [4]. Callers' levels of crisis and hopelessness were rated during the calls and found to decrease during the course of the call. In a second study, focussing on 1,085 participants who

1  
2  
3  
4 were suicidal Gould et al. [5] found that levels of intent to die over the course of a call  
5  
6 decreased and that there were continuing falls in hopelessness and psychological pain  
7  
8 over the continuing weeks.  
9

10 Web-based interventions are now more frequently used in **helpline services**, and  
11  
12 research of their usefulness is emerging in community settings. Two studies of online e-  
13  
14 health applications targeting either risk factors for suicide (depression) or suicide  
15  
16 ideation were published in 2012. The first was an uncontrolled service evaluation which  
17  
18 found a 30% reduction in suicide ideas [6] over the course of a depression web  
19  
20 program. The second was a randomised controlled trial of an online intervention which  
21  
22 examined the effectiveness and cost effectiveness of an automated six module, six  
23  
24 week, intervention specifically targeting suicide ideation for individuals with mild to  
25  
26 moderate suicidal thoughts. The intervention was based on Cognitive Behaviour  
27  
28 Therapy (CBT), with Dialectical Behaviour Therapy, Problem Solving Therapy and  
29  
30 **Mindfulness-Based Cognitive Therapy** included. Significant reductions in suicidal  
31  
32 thoughts were found relative to Control condition. The mean incremental cost-  
33  
34 effectiveness ratio (ICER) was estimated to be €34,727 (US \$41,325) for an additional  
35  
36 treatment response, indicating annual cost savings per treatment responder [7].  
37  
38  
39  
40  
41  
42  
43

44 In 2012, we published the results of a randomised controlled trial investigating  
45  
46 the effects of a web application in reducing depression and anxiety in a large **helpline**  
47  
48 [8, 9]. This trial compared four conditions: a treatment as usual condition (TAU), where  
49  
50 the participant could call the crisis line at any time; a telephone **call back** service where  
51  
52 the participant was contacted for 10 minutes **systematically** once a week for six weeks; a  
53  
54 CBT internet program for depression combined with a evidence-based depression  
55  
56  
57  
58  
59  
60

1  
2  
3  
4 information website, and a combined condition which incorporated telephone call back  
5  
6 and the web programs. Both the web programs alone, and the web programs in  
7  
8 combination with the telephone call back, were effective at 12 months in reducing  
9  
10 depression symptoms, relative to TAU. This study also measured suicide ideation, and  
11  
12 in this paper, we report the results using this outcome measure.

13  
14  
15 Suicide ideation is a substantial risk factor for suicide attempt. Theories of  
16  
17 suicide causation point to the importance of depression and hopelessness in leading to  
18  
19 increased levels of suicide ideation and attempts (see [10]). We hypothesised that  
20  
21 suicide ideation would be reduced over time in those conditions which successfully  
22  
23 reduced depression. Accordingly, we first examined the effect of the four interventions  
24  
25 conditions on suicide ideation. For suicide ideation, we hypothesised that the web CBT  
26  
27 intervention focussing on reducing depression—with or without the telephone call  
28  
29 back— would result in significantly greater reduction of suicide ideation than the other  
30  
31 two conditions, which did not include interventions specifically aiming to reduce  
32  
33 depression. We then used logistic regression to explore which factors, in addition to  
34  
35 any effect of the intervention, predicted changes in suicide ideation at post-test. These  
36  
37 factors were baseline suicidality, baseline depression, baseline anxiety, age, gender,  
38  
39 education, workforce participation, and changes in depression and anxiety over the  
40  
41 course of the intervention (pre to post-test).  
42  
43  
44  
45  
46  
47  
48

## 49 **METHOD**

50  
51  
52 Data for this study were collected as part of a randomized controlled trial of the  
53  
54 impact of a Web-based CBT and psychoeducation intervention on depression symptoms  
55  
56 [9]. The trial comprised four arms: (i) a Web-based CBT intervention; (ii) a Web-based  
57  
58  
59  
60

1  
2  
3  
4 CBT intervention delivered in conjunction with a telephone call back; (iii) the proactive  
5  
6 call back telephone line alone, and (iv) TAU, which consisted of the opportunity for the  
7  
8 participant to contact the helpline if needed.  
9

### 10 11 **Ethics statement**

12 Ethics approval for the trial was granted by the Australian National University  
13  
14 Human Research Ethics Committee (Protocol no. 2007/12).  
15  
16  
17  
18  
19

### 20 21 **Participants**

22  
23 Participants were 155 callers to Lifeline, Australia's 24-hour telephone  
24  
25 counselling service, recruited between July 2007 and January 2009. High distress or  
26  
27 acutely suicidal participants were excluded. A total of 910 callers agreed to be screened  
28  
29 by telephone. Of these, 142 (15.6%) were subsequently unable to be contacted, 61 (7%)  
30  
31 were later unwilling to participate, and 337 (37%) did not meet eligibility criteria.  
32  
33 Respondents were not eligible for inclusion in the trial if they (1) scored less than 22 on  
34  
35 the Kessler Psychological Distress Scale [11] (138/337, 41%), a brief screening scale  
36  
37 used clinically and epidemiologically, (2) had, by self-report, a diagnosis of  
38  
39 schizophrenia or bipolar disorder (89, 26%), or (3) did not have Internet access (67,  
40  
41 20.0%). Ineligible participants were offered brochures sent by mail containing  
42  
43 information about the Web intervention used in the trial. Of the 370 people eligible for  
44  
45 inclusion in the trial, 155 completed informed consent procedures and pre-intervention  
46  
47 assessments, and were randomly assigned to the trial conditions. The trial flow is  
48  
49 illustrated in Figure 1.  
50  
51  
52  
53  
54

### 55 56 **Procedure**

1  
2  
3  
4 Following screening and informed consent procedures, pre-intervention data  
5  
6 were obtained through a self-report questionnaire mailed to participants. A block  
7  
8 randomization procedure was used, with stratification based on site of recruitment and  
9  
10 severity of psychological distress at screening. Allocation of participants to trial  
11  
12 conditions was conducted independently by a research assistant not involved in the day-  
13  
14 to-day running of the trial. Following randomization, all participants were contacted by  
15  
16 telephone and were mailed the relevant materials for their allocated condition.  
17  
18  
19

## 20 21 **Intervention and Trial Conditions**

22  
23  
24 The Web-only intervention consisted of Web-based psychoeducation (in week 1  
25  
26 provided by BluePages: bluepages.anu.edu.au) combined with Web-based CBT (in  
27  
28 weeks 2–6 provided by MoodGYM: moodgym.anu.edu.au). BluePages is an  
29  
30 educational site that provides information on evidence-based interventions for  
31  
32 depression. MoodGYM is a first generation, interactive web application which delivers  
33  
34 cognitive behaviour therapy through a series of 5 modules, captures user behaviour and  
35  
36 self-report symptoms on validated scales, and offers an online CBT workbook. Both of  
37  
38 these Web programs have been shown to reduce depression symptoms in community  
39  
40 users [12]. A printed manual containing week-by-week instructions for accessing the  
41  
42 Web programs (via a login) was mailed to participants at the start of the trial.  
43  
44  
45  
46

47  
48 In the Web with telephone call back condition, participants completed the Web  
49  
50 intervention and also received a weekly 10-minute telephone call from a Lifeline  
51  
52 telephone counsellor. The purpose of these calls was to address any issues associated  
53  
54 with the participants' use of the intervention.  
55  
56  
57  
58  
59  
60

1  
2  
3  
4 In the telephone **call back** only condition, participants received a weekly 10-minute  
5  
6 telephone call initiated from a telephone counsellor. **These scripted calls focused on**  
7  
8 **various environmental and lifestyle factors associated with depression.**

9  
10  
11 In the TAU condition, participants received neither the call back nor Web interventions,  
12  
13 but were free to use the **helpline** service as needed. Participants in this condition were  
14  
15 wait-listed to receive the Web-only intervention following completion of the 6-month  
16  
17 follow-up.  
18  
19

20  
21 **As in the TAU condition, participants in all 3 other conditions were also** able to use the  
22  
23 **helpline** service as needed, which provided usual emergency or support services. **Self-**  
24  
25 **reported contacts with the service were taken at each follow-up occasion for each of the**  
26  
27 **4 conditions.** Any use of this service during the intervention period was additional to the  
28  
29 10-minute telephone calls offered **proactively as part of the call back component of the**  
30  
31 **Telephone call back condition and the Internet plus call back condition.**  
32  
33  
34  
35

## 36 **Measures**

### 37 *Suicidal ideation*

38  
39  
40  
41  
42 Suicidal ideation was measured using four items from the 28-item General  
43  
44 Health Questionnaire (GHQ-28; [1]). The four questions measure suicidal ideation,  
45  
46 asking respondents to indicate how they have felt over the last few weeks. The first two  
47  
48 items: 'Have you recently felt that life is not worth living' and 'Have you recently found  
49  
50 yourself wishing you were dead and away from it all' were scored on the 4-point scale:  
51  
52 'Not at all', 'No more than usual', 'Rather more than usual' or 'Much more than usual'.  
53  
54  
55 The remaining two items: 'Have you recently had thoughts of the possibility that you  
56  
57  
58  
59  
60



1  
2  
3  
4 might do away with yourself’ and ‘Have you recently found that the idea of taking your  
5  
6 own life kept coming into your mind’ were scored on the 4-point scale: ‘Definitely not’,  
7  
8 ‘I don’t think so’, ‘Has crossed my mind’ or ‘Definitely has’. Responses were then  
9  
10 categorised in a binary manner, with the negatively-worded response categories (Not at  
11  
12 all, No more than usual, definitely not, and I don’t think so) scored with a 0, and the  
13  
14 positively-worded response categories scored with a 1. Binary scores for each item were  
15  
16 summed to provide a total scale score ranging from 0 to 4, with a higher score  
17  
18 indicating higher suicidal ideation. This scoring system is that used for all items and sub  
19  
20 scores of the GHQ-28, which has been validated in Australian populations [13]. The  
21  
22 four suicide items from the GHQ-28 have been used extensively by Goldney and  
23  
24 colleagues to assess suicidal ideation in a number of Australian samples [14-16]. These  
25  
26 items have been validated relative to other well established measures of suicidal intent  
27  
28 and hopelessness [17, 18]. Cronbach Alpha for the 4 items at baseline in the present  
29  
30 sample was 0.90.  
31  
32  
33  
34  
35  
36

### 37 *Predictor variables*

38  
39 Depression symptoms were measured by the Center for Epidemiologic Studies  
40  
41 Depression Scale (CES-D)[19], a widely used, 20 item scale with strong reliability and  
42  
43 validity [19, 20], with scores ranging from 0 to 60. Anxiety symptoms were assessed  
44  
45 using the 14-item anxiety scale from the Depression, Anxiety and Stress Scales (DASS-  
46  
47 A;[21]. Each of these items is rated on a four-point scale from 0 (“did not apply to me at  
48  
49 all”) to 4 (“applied to me most of the time”), with total scores ranging from 0 to 42. The  
50  
51 reliability and validity of the DASS-A scale has been demonstrated previously ([22,  
52  
53 23]).  
54  
55  
56  
57  
58  
59  
60

1  
2  
3  
4 Demographic variables including age, gender, educational attainment and  
5  
6 workforce participation were assessed by self-report in the pre-test survey. Educational  
7  
8 attainment was based on two items assessing highest level of education, which were  
9  
10 used to form an estimate of total number of years of education. Workforce participation  
11  
12 was based on an item assessing employment status, with “unemployed” and “not in the  
13  
14 labour force” categorised as non-participation, and employed “full-time” or “part-time”  
15  
16 categorised as participation.  
17  
18  
19

### 20 21 22 **Statistical analyses** 23

24 Differential changes in suicide ideation across the four conditions were assessed  
25  
26 using mixed model repeated measures analysis of variance. Within-person variation was  
27  
28 modeled using an unstructured covariance matrix and degrees of freedom were  
29  
30 estimated using Satterthwaite’s approximation. This model included the fixed effects of  
31  
32 condition, time (pre, post, 6 month, 12 month) and the interaction between condition  
33  
34 and time. The presence of a significant interaction between an active intervention and  
35  
36 the TAU condition over time would indicate a significant reduction in suicidal ideation  
37  
38 for that condition relative to control. Within-condition change in suicidal ideation was  
39  
40 also examined using this model. Mixed models yield an intention-to-treat analysis,  
41  
42 using all available measurement points for each participant under the assumption that  
43  
44 withdrawal data are missing at random. Two participants with missing suicidal ideation  
45  
46 scores at baseline were omitted from analyses. To evaluate whether the scoring of the  
47  
48 suicidal ideation scale influenced the findings, the models were re-estimated using a  
49  
50 continuous score of suicidal ideation, assessed at each time point as the sum of  
51  
52 responses to the four ideation items (range 0-12).  
53  
54  
55  
56  
57  
58  
59  
60

1  
2  
3  
4 Logistic regression was then used to examine predictors of suicidal ideation at  
5  
6 post-intervention, defined as a suicidal ideation score of 0. In particular, the hypothesis  
7  
8 was assessed that reduction in depression symptoms from pre- to post-intervention  
9  
10 predicted remission of ideation. Only completers of the post-test assessment were  
11  
12 included in this analysis. A depression symptom change score from pre- to post-  
13  
14 intervention was calculated by subtracting post-intervention CES-D scores from pre-  
15  
16 intervention scores, with positive scores indicating a reduction/improvement in  
17  
18 symptoms. The effect of anxiety symptoms and changes in anxiety were assessed in the  
19  
20 same way. Suicidal ideation scores (ranging from 0 to 4) were coded categorically as  
21  
22 “0” (score  $\geq 1$ , indicating some suicidal ideation) or “1” (score = 0, no ideation). To  
23  
24 control for baseline depression, baseline anxiety, baseline suicidality and intervention  
25  
26 condition, these variables were included in the regression simultaneously with the  
27  
28 depression change score. In addition, age, gender, education and workforce  
29  
30 participation were included in the models due to their potential associations with  
31  
32 suicidal ideation.  
33  
34  
35  
36  
37  
38  
39  
40  
41  
42  
43  
44  
45  
46  
47  
48  
49  
50  
51  
52  
53  
54  
55  
56  
57  
58  
59  
60

Figure 1: Trial Flow Diagram

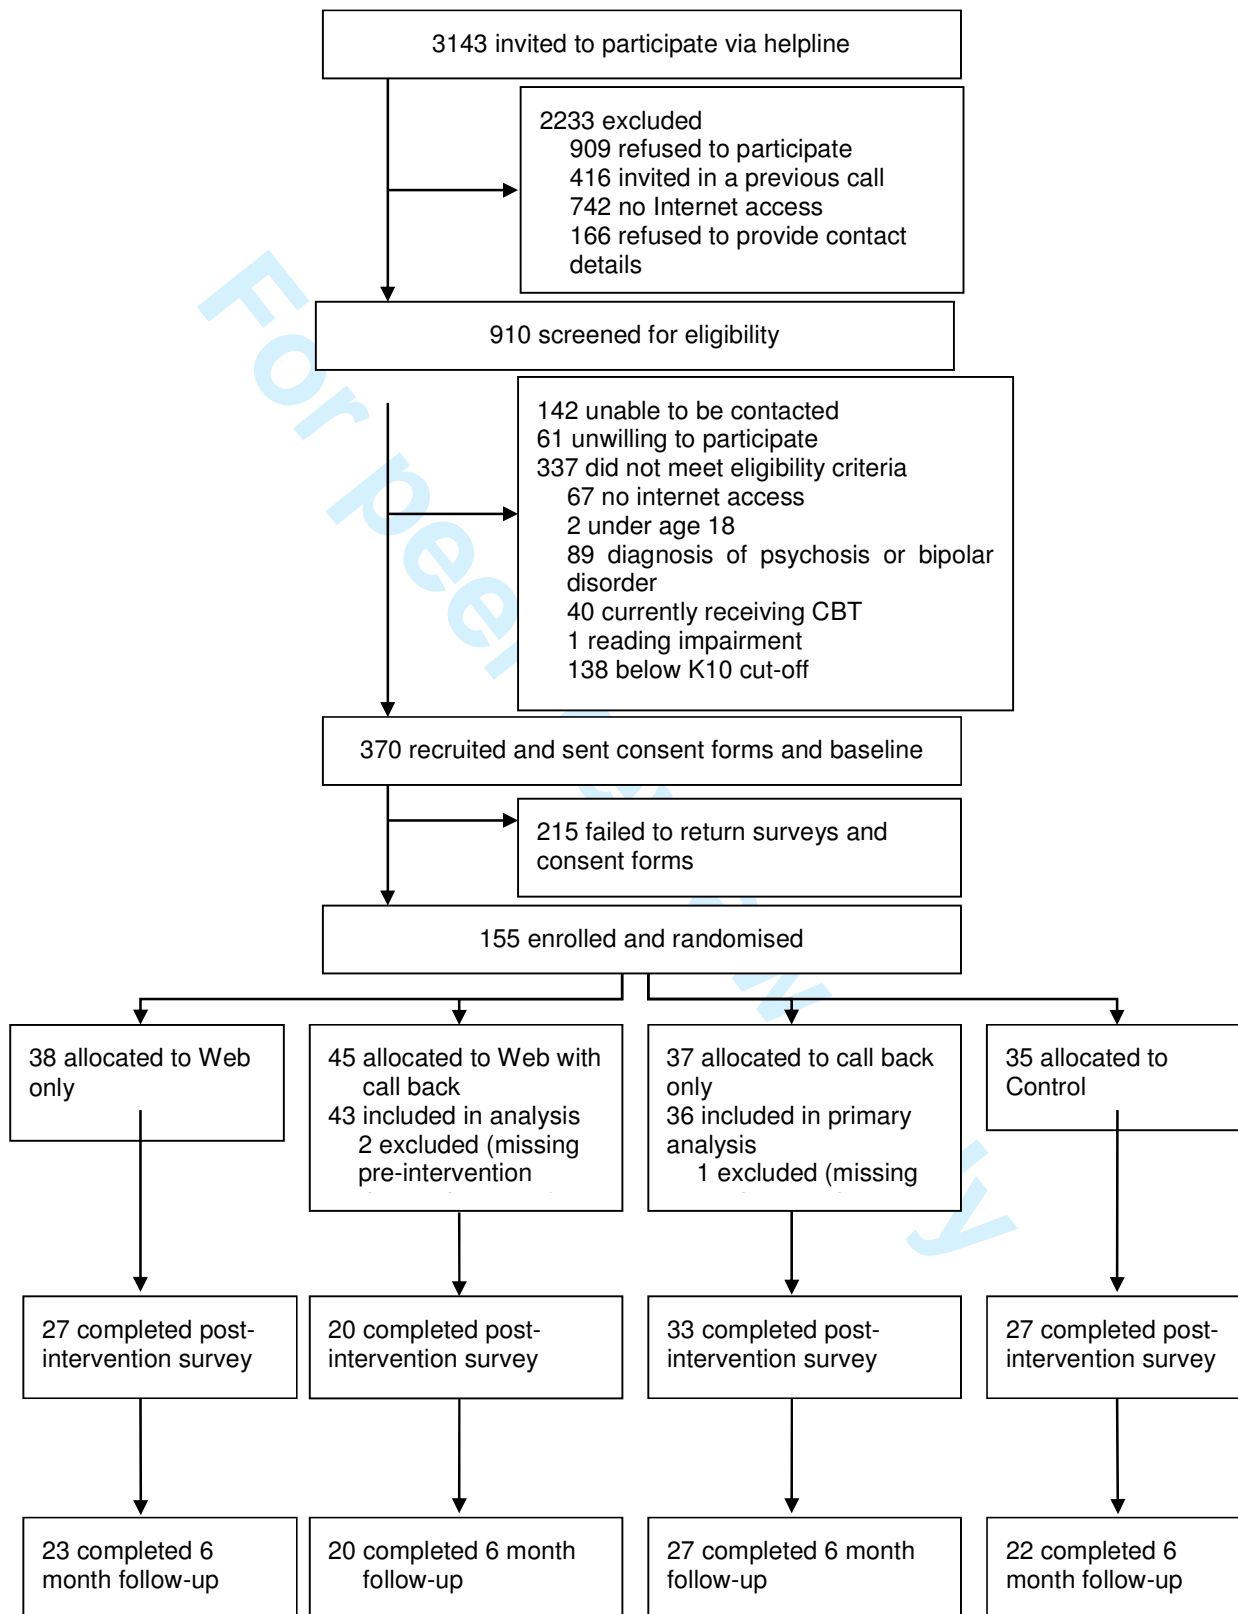

## RESULTS

### Descriptives and changes in suicide ideation

Table 1 shows the characteristics of the sample at baseline, with mental health measures for post-intervention also presented. The age range was 19-72, with a median age of 42 years. The majority of participants (57%) had graduated from high school. Most of the participants were female and approximately half were in the work force. Depression and anxiety scores were considerably higher than the cut points for the scales used at both time points, although there were decreases from pre- to post-intervention. Likewise, high rates of suicidality were observed, with 62.7% and 41.5% reporting suicidal ideation at pre- and post-intervention respectively.

**Table 1.** Characteristics of participants

|                                                 | N   | Mean  | SD    |
|-------------------------------------------------|-----|-------|-------|
| Age                                             | 155 | 41.49 | 12.35 |
| Years of education                              | 150 | 13.47 | 2.67  |
| CES-D depression score, pre-intervention        | 152 | 36.25 | 10.22 |
| CES-D depression score, post-intervention       | 107 | 28.68 | 14.40 |
| DASS anxiety score, pre-intervention            | 154 | 13.34 | 8.03  |
| DASS anxiety score, post-intervention           | 107 | 11.45 | 10.16 |
| GHQ suicidal ideation score - pre-intervention  | 153 | 1.73  | 1.64  |
| GHQ suicidal ideation score - post-intervention | 106 | 1.00  | 1.45  |
|                                                 | N   | Count | %     |
| <i>Gender</i>                                   | 155 |       |       |
| Female                                          |     | 127   | 81.9% |
| Male                                            |     | 28    | 18.1% |
| <i>Workforce participation</i>                  | 155 |       |       |
| Participation                                   |     | 72    | 46.5% |
| Non-participation                               |     | 83    | 53.5% |
| <i>Treatment condition</i>                      | 155 |       |       |
| Internet only                                   |     | 38    | 24.5% |
| Internet plus call back                         |     | 45    | 29.0% |
| Telephone call back only                        |     | 37    | 23.9% |
| Treatment as usual                              |     | 35    | 22.6% |

*Mixed models: Effect of intervention type on suicidal ideation*

Suicide ideation declined significantly over the 12 month period ( $F(3, 95.4) = 15.06, p < 0.001$ ). However, differences in change over time between conditions were not significant ( $F(8, 115.8) = 1.13, p = .352$ ). Figure 2 shows the estimated marginal means for suicidal ideation across measurement occasions.

**Figure 2:** Estimated marginal means for suicidal ideation across measurement occasions.

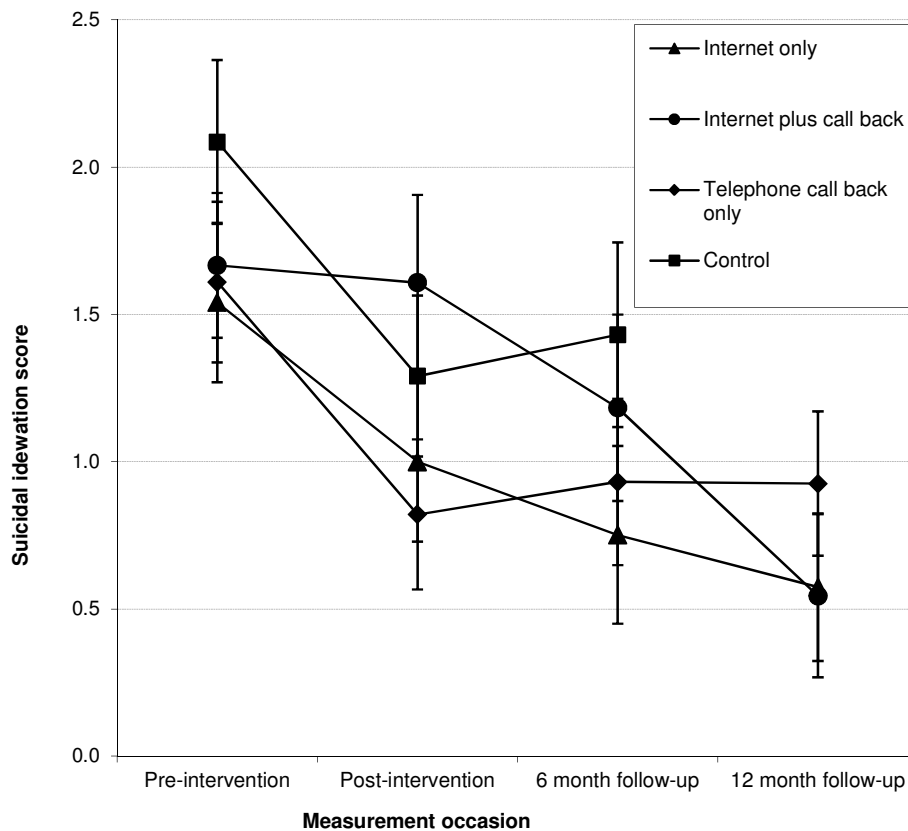

*Within group contrasts*

As can be seen in Table 2, planned contrasts revealed that participants in the call back only and TAU conditions showed significant declines in suicidal ideation from pre- to post-intervention and from pre-intervention to 6 month follow-up. Declines in

suicidal ideation from pre-intervention to 12 month follow-up were significant for participants in all conditions in which the difference could be assessed.

**Table 2.** Within group contrast estimates and significance tests for suicidal ideation

| Condition                            | Statistic         | Contrast                              |                                       |                                        |
|--------------------------------------|-------------------|---------------------------------------|---------------------------------------|----------------------------------------|
|                                      |                   | Pre-intervention to post-intervention | Pre-intervention to 6 month follow-up | Pre-intervention to 12 month follow-up |
| Internet only                        | Contrast estimate | -.54                                  | -.79                                  | -.97                                   |
|                                      | Test value        | $t(109.8) = -1.98$                    | $t(101.5) = -2.50$                    | $t(73.2) = -3.65$                      |
|                                      | <i>p</i> value    | .050                                  | .016                                  | <.001                                  |
| Internet + telephone <b>callback</b> | Contrast estimate | -.06                                  | -.48                                  | -1.12                                  |
|                                      | Test value        | $t(121.3) = -.20$                     | $t(106.2) = -1.45$                    | $t(80.8) = -3.91$                      |
|                                      | <i>p</i> value    | .85                                   | .15                                   | <.001                                  |
| Telephone <b>callback</b> only       | Contrast estimate | -.79                                  | -.68                                  | -.68                                   |
|                                      | Test value        | $t(105.6) = -3.05$                    | $t(100.0) = -2.22$                    | $t(78.0) = -2.61$                      |
|                                      | <i>p</i> value    | .003                                  | .029                                  | .011                                   |
| Treatment as usual                   | Contrast estimate | -.80                                  | -.66                                  |                                        |
|                                      | Test value        | $t(108.0) = -2.89$                    | $t(103.1) = -1.96$                    |                                        |
|                                      | <i>p</i> value    | .005                                  | .053                                  |                                        |

#### *Between group contrasts*

No significant differences were found between conditions at post-intervention, 6 month follow-up, or 12 month follow-up: Internet only vs. TAU (post-test: Contrast estimate = .26;  $p = .51$ ; 6-month follow-up: Contrast estimate = -.14,  $p = .77$ ); Internet only vs. Telephone **callback** only (post-test: Contrast estimate = .25;  $p = .51$ ; 6-month follow-up: Contrast estimate = -.11,  $p = .80$ ; 12-month follow-up: Contrast estimate = -.28;  $p = .45$ ); Internet + telephone **callback** vs. TAU (post-test: Contrast estimate = .74;

1  
2  
3  
4  $p = .07$ ; 6-month follow-up: Contrast estimate = .17,  $p = .72$ ); Internet + telephone call  
5  
6 **back** vs Telephone **call back** only (post-test: Contrast estimate = .73;  $p = .07$ ; 6-month  
7  
8 follow-up: Contrast estimate = .19,  $p = .67$ ; 12-month follow-up: Contrast estimate = -  
9  
10 .44;  $p = .26$ ); Telephone **call back** only vs TAU (post-test: Contrast estimate = .01;  $p =$   
11  
12 .99; 6-month follow-up: Contrast estimate = -.02,  $p = .96$ ); Internet only vs Internet +  
13  
14 telephone call back (post-test: Contrast estimate = -.48;  $p = .24$ ; 6-month follow-up:  
15  
16 Contrast estimate = -.31,  $p = .51$ ; 12-month follow-up: Contrast estimate = .16;  $p = .69$ ).  
17  
18 To test whether the lack of between-group effects were related to scaling effects of the  
19  
20 suicidal ideation measure, the models were re-estimated using a continuous score for  
21  
22 suicidal ideation. As with the original analysis, there was significant reduction over time  
23  
24 in suicidal ideation scores ( $F(3, 94.5) = 14.08, p < 0.001$ ). Again, there was no  
25  
26 significant interaction between condition and time ( $F(8, 89.9) = 0.81, p = 0.598$ ),  
27  
28 indicating no significant difference in change of suicidal ideation scores between the  
29  
30 intervention groups across the study period.  
31  
32  
33  
34  
35  
36  
37  
38  
39  
40  
41  
42  
43  
44  
45  
46  
47  
48  
49  
50  
51  
52  
53  
54  
55  
56  
57  
58  
59  
60

#### *Effect sizes for suicidal ideation*

At post-intervention, effect sizes were 0.10 (95% CI: -0.43 to 0.64) for the Internet only condition and 0.04 (95% CI: -0.54 to 0.62) for the Internet plus call back condition, compared to the TAU condition. Compared to call back only, effect sizes were 0.28 (95% CI: -0.24 to 0.79) for the Internet only condition and 0.41 (95% CI: -0.15 to 0.98) for the Internet plus call back condition. At 6 month follow-up, effect sizes were 0.36 (95% CI: -0.24 to 0.96) for the Internet only condition and 0.20 (95% CI: -0.42 to 0.81) for the Internet plus **call back** condition, compared to the TAU condition.



1  
2  
3  
4 Compared to telephone call back only, effect sizes were 0.08 (95% CI: -0.48 to 0.63) for  
5  
6 the Internet only condition and 0.07 (95% CI: -0.51 to 0.65) for the Internet plus  
7  
8 telephone call back condition. At 12 month follow-up, effect sizes were 0.28 (95% CI: -  
9  
10 0.33 to 0.89) for the Internet only condition and 0.45 (95% CI: -0.24 to 1.13) for the  
11  
12 Internet plus call back condition, compared with the call back only condition.  
13  
14

### 15 16 17 *Predictors of suicide ideation*

18  
19 A logistic regression analysis was designed to measure predictors of suicide  
20  
21 ideation change taking account of intervention condition. Consistent with findings  
22  
23 reported above, compared to baseline (M:1.73; SD: 1.64; N=153) suicidal ideation  
24  
25 significantly decreased in the whole sample at post-test (M:1.00; SD:1.45; N=106), 6-  
26  
27 month (M:0.99; SD:1.54; N=91) and 12-month follow-up (M:0.66; SD:1.27; N=56).  
28  
29 However, as there was no significant interaction effect between condition and time on  
30  
31 suicidal ideation, this interaction was not retained in the model. Table 3 shows the  
32  
33 results for the model with interactions excluded. As would be expected, higher levels of  
34  
35 suicide ideation at baseline were associated with significantly reduced odds of absence  
36  
37 of suicide ideation at post-test. Neither baseline depression nor anxiety was significantly  
38  
39 associated with no suicide ideation at post-test. There were also no significant effects of  
40  
41 any of the demographic characteristics. However, a greater improvement in depression  
42  
43 symptoms from pre- to post-intervention was associated with increased odds of no  
44  
45 suicidal ideation at post-intervention. At baseline, the majority of participants (n=93;  
46  
47 62.0%) reported both depressive symptoms and suicidal ideation. This proportion  
48  
49 decreased at all time-points following the interventions [post-test: 44 (41.5%); 6-months  
50  
51 follow-up: 30 (33.0%); 12-months follow-up: 13 (23.2%)]. Based on McNemar's tests  
52  
53  
54  
55  
56  
57  
58  
59  
60

using completers of each assessment, these decreases were significant at all three time points ( $P = 0.005$ ,  $P < 0.001$  and  $P = 0.002$  at post, 6-months and 12-months respectively). There was no significant difference in the proportion of participants with depression but no suicidal ideation, except at 12-month follow-up [baseline:  $n=53$  (35.3%); post-test:  $n=42$  (39.6%), 6-months follow-up:  $n=28$  (30.8%); 12-months follow-up: 18 (32.1%);  $P = 1.00$ ;  $P = 0.15$  and  $P = 0.019$  at post, 6-months and 12-months respectively).

**Table 3.** Logistic regression analyses of remission of suicidal ideations (completers only)

|                                  | OR    | p      | 95% CI |        |
|----------------------------------|-------|--------|--------|--------|
|                                  |       |        | Lower  | Upper  |
| Suicidality score at baseline    | 0.409 | <0.001 | 0.249  | 0.671  |
| <i>Condition</i>                 | --    | 0.239  |        |        |
| TAU                              | 1.000 | --     |        |        |
| Internet only                    | 1.408 | 0.699  | 0.248  | 8.001  |
| Internet + telephone call back   | 0.323 | 0.234  | 0.050  | 2.082  |
| Telephone call back only         | 2.442 | 0.284  | 0.476  | 12.512 |
| Baseline depression score        | 0.926 | 0.081  | 0.849  | 1.010  |
| Depression change score          | 1.165 | <0.001 | 1.070  | 1.267  |
| Baseline anxiety score           | 1.066 | 0.256  | 0.955  | 1.190  |
| Anxiety change score             | 0.986 | 0.836  | 0.859  | 1.130  |
| Gender: F vs M                   | 0.992 | 0.993  | 0.174  | 5.646  |
| Age                              | 1.051 | 0.054  | 0.999  | 1.106  |
| Years of education               | 0.897 | 0.438  | 0.681  | 1.181  |
| Not in labour force vs. employed | 0.915 | 0.899  | 0.233  | 3.592  |

1  
2  
3  
4 \*only main effects included.  
5  
6  
7

## 8 **DISCUSSION**

9  
10 This was the first study to examine the effect of online interventions on suicide  
11 ideation in a helpline using a randomised controlled trial design. In contrast to our  
12 hypothesis, results from our study indicated that irrespective of intervention condition,  
13 participants' suicidal ideation declined over time at post-test, and six months. Declines  
14 were slower to become significant for those randomised to the Internet plus call back  
15 condition. For all groups, declines in suicidal ideation remained significant at 12 month  
16 follow-up. Although there were small effects at post-test and medium effect sizes at  
17 follow-up among the intervention conditions, there were no consistent overall effects  
18 for condition. Participants having higher baseline suicide scores were more likely to  
19 continue experiencing suicidal ideation at post-intervention, while those with greater  
20 improvements in depression symptoms were less likely to experience suicide ideation at  
21 post-intervention.  
22  
23  
24  
25  
26  
27  
28  
29  
30  
31  
32  
33  
34  
35  
36

37 Several studies have shown reductions of suicide ideation in uncontrolled pre  
38 post trials of counselling or internet CBT (e.g.,[5, 6]). This is, to our knowledge the  
39 first randomised controlled trial of an intervention in a helpline, comparing a number of  
40 active interventions to treatment as usual. The study is also unique in that it examined  
41 predictors of ideation change, taking account of the effect of intervention. As previously  
42 reported for this study [9], web based CBT, and web CBT with counsellor call back  
43 significantly reduced depression symptoms relative to TAU. These findings indicate  
44 that suicide ideation did not follow the same pattern as depression in response to the  
45 intervention, and, more generally, that suicide ideation was not strictly tethered to  
46  
47  
48  
49  
50  
51  
52  
53  
54  
55  
56  
57  
58  
59  
60

1  
2  
3  
4 depression. Nevertheless, the regression analysis found that taking account of  
5  
6 intervention type, changes in depression did predict later lower levels of ideation,  
7  
8 suggesting that depression change is an important albeit not necessarily the only factor  
9  
10 in reducing ideation. We interpret these findings to suggest that change in depression, in  
11  
12 whatever way it is brought about, is a contributing variable to reduction in suicide  
13  
14 ideation. A second explanation for the findings is that changes in suicide ideation and  
15  
16 changes in depression follow different time trajectories, with ideation resolving faster  
17  
18 than depression. The two constructs are likely to be interactive, with ideation reduction  
19  
20 assisting in lowering depression symptoms over time. Hopelessness may mediate both  
21  
22 depression and ideation but may influence each within different time frames [24].  
23  
24 Interestingly, a recent meta-analysis [25] has examined the effects of face-to-face  
25  
26 psychotherapy for adult depression on suicidality. It found a non-significant effect of  
27  
28 psychotherapy in the reduction of suicidality but a significant effect for depression,  
29  
30 consistent with concept that depression and suicidality are not strictly tethered.  
31  
32

33  
34  
35 Suicide ideation resolved in our TAU condition, consistent with the notion that ideation  
36  
37 is responsive to events or processes that occurred with the passage of time for  
38  
39 participants with access to “usual services”. We do know that at 6 weeks TAU  
40  
41 participants were more likely to make more calls to the helpline service compared to  
42  
43 participants in the Internet alone condition, but not to the other conditions. Eighty one  
44  
45 percent of TAU participants reported that they made at least one call, and approximately  
46  
47 55% had made 3 or more calls. These calls may have contributed to the suicide  
48  
49 resolution in this and the other two conditions. However, these spontaneous calls were  
50  
51 unlikely to be responsible for the differences in depression resolution, given that the  
52  
53 Internet alone group also showed drops in depression levels.  
54  
55  
56  
57  
58  
59  
60

1  
2  
3  
4 The finding that all groups showed suicide resolution, however, does not rule  
5  
6 out the possibility that specific psychological or proactive interventions will support  
7  
8 faster resolution of suicide ideation symptoms than the interventions reported here.  
9  
10 Indeed the intervention developed by Van Spijker et al. [7] may be one of these specific  
11  
12 interventions.  
13

### 14 15 16 17 *Limitations of the study* 18

19  
20  
21 One explanation of the failure to find an effect of intervention type on suicide  
22  
23 ideation outcomes is that these findings are due to regression to the mean. Because all  
24  
25 scores were initially high at baseline, scores would be expected to revert to the mean on  
26  
27 the second occasion of measurement. Intervention completion rates were lower in our  
28  
29 study relative to some other trials of web-based treatments for depression [26] but not of  
30  
31 other telephone-based services [3]. The reasons for this are unclear. The current trial  
32  
33 was a true effectiveness trial employing a volunteer workforce for recruitment and call  
34  
35 back, and hence might be expected to be associated with greater recruitment and  
36  
37 adherence problems relative to the more controlled environment of an efficacy study  
38  
39 [27]. Also, the interventions were short, delivered by non-health professionals, and may  
40  
41 have constituted the only service received. The measure used to assess suicidality used  
42  
43 items that categorised outcomes dichotomously, and then summed responses, as per  
44  
45 scale score recommendations. Moreover, these scores were then further dichotomised in  
46  
47 the regression analysis. This is essentially a conservative treatment of data. We did  
48  
49 investigate whether other continuous scoring methods might reveal intervention effects.  
50  
51 These data did not yield any relationships. The generalisability of the findings to  
52  
53  
54  
55  
56  
57  
58  
59  
60

1  
2  
3  
4 severely suicidal individuals is also limited, given acutely suicidal or highly distressed  
5  
6 callers were specifically not invited to participate. We had relatively low success in  
7  
8 recruiting participants to the trial, a finding that reflects the nature of effectiveness trials  
9  
10 using targeted samples such as ours [27] and where a mismatch occurs between the  
11  
12 expectation of phoning a crisis centre and being 'diverted' to another program. Finally,  
13  
14 we were not able to analyse the influence of other psychological characteristics on  
15  
16 treatment outcome, such as hopelessness, or support from family, which might affect  
17  
18 both depression and suicidal ideation levels. These measures were not included in our  
19  
20 study.  
21  
22  
23  
24

#### 25 *Future research*

26  
27  
28 Replications of this trial need to be performed to establish consistency of  
29  
30 research findings. Furthermore, examination of mediators of change such as  
31  
32 hopelessness in larger samples would add significantly to our knowledge of which  
33  
34 components of therapy are necessary for reduction of suicide ideation. Given the  
35  
36 absence of differences between conditions, it may be that one or more components  
37  
38 present in each treatment arm (e.g., giving hope, or participating in research) are  
39  
40 responsible for change in outcome. Identifying these components and altering their  
41  
42 presence by intensifying or omitting them in a new intervention trial would add to our  
43  
44 current knowledge mechanisms of change. Investigation of the causes of reductions in  
45  
46 suicide ideation is warranted.  
47  
48  
49

#### 50 *Clinical implications*

1  
2  
3  
4 Despite the limitations, the current study clearly demonstrated that suicide  
5  
6 ideation declined irrespective of intervention, telephone counsellor contact or wait-list.  
7  
8 The addition of the TAU control condition is a significant improvement over previous  
9  
10 trials. The study demonstrated that, while CBT internet interventions are significantly  
11  
12 more effective in resolving depression symptoms than control conditions, these operate  
13  
14 no more successfully than current call centre practice in resolving suicide ideation.  
15  
16 Suicide ideation reduces significantly more effectively in those individuals who also  
17  
18 have resolving depression. The majority of people experiencing suicidal ideation do not  
19  
20 receive mental health treatment [28]. Internet-based or telephone based interventions  
21  
22 have the **advantage** that they can be easily accessed by large numbers of people, on an  
23  
24 anonymous basis. In line with Watts et al. [6], our findings demonstrate the importance  
25  
26 of not excluding suicidal participants from interventions designed to target depression.  
27  
28  
29  
30  
31  
32

### 33 **ACKNOWLEDGEMENTS**

34  
35  
36  
37 Nicole Burgess coordinated and conducted data collection for the trial. Dawn O'Neil  
38  
39 was involved in obtaining funding for the trial and coordinating Lifeline Australia's  
40  
41 collaboration with the ANU. Assoc Prof Richard O'Kearney was a member of LF's PhD  
42  
43 supervisory panel. Trevor Carlyon was also involved in coordinating Lifeline staff and  
44  
45 volunteer involvement in the trial and supported Nicole in her role. The e hub team  
46  
47 supported the trial implementation. We acknowledge the contributions of the Lifeline  
48  
49 counselors who participated in this trial.  
50  
51  
52  
53  
54

### 55 **COMPETING INTERESTS**

1  
2  
3  
4  
5  
6 None.  
7  
8  
9

## 10 FUNDING

11  
12  
13  
14  
15 Australian Research Council Linkage Grant (LP0667970), 2006, 3 years, \$279,325  
16  
17 (Christensen, Griffiths, Mackinnon, Smith), Internet technologies, health informatics,  
18  
19 and statistical models, and new delivery platforms in call centres (CIA).  
20

21  
22 HC and PB were supported by NHMRC 525411 and NHMRC Early Career Fellowship  
23  
24 1035262. KMG is supported by NHMRC Fellowship No. 525413.  
25  
26  
27  
28  
29

## 30 REFERENCE LIST

- 31  
32  
33  
34  
35 1. Goldberg D and V Hillier. A scaled version of the General Health  
36  
37 Questionnaire. *Psycholog Med* 1979; **9**:139-145.  
38  
39 2. Lifeline Australia, Lifeline Australia Annual Report 2009-2010, 2010, Lifeline  
40  
41 Australia Ltd: Canberra.  
42  
43 3. Rhee W et al. Efficacy of brief telephone psychotherapy with callers to a suicide  
44  
45 hotline. *Suicide Life Threat Beh* 2005; **35**:317-28.  
46  
47  
48 4. Kalafat J et al. An evaluation of crisis hotline outcomes. Part 1: Nonsuicidal  
49  
50 crisis callers. *Suicide Life Threat Behav* 2007; **37**: 322-37.  
51  
52  
53 5. Gould MS et al. An evaluation of crisis hotline outcomes. Part 2: Suicidal  
54  
55 callers. *Suicide Life Threat Behav* 2007; **37**: 338-52.  
56  
57  
58  
59  
60



- 1  
2  
3  
4 6. Watts S et al. A clinical audit of changes in suicide ideas with internet treatment  
5  
6 for depression. *BMJ Open* 2012; **2**:e001558.  
7
- 8  
9 7. van Spijker BA, van Straten A, Kerkhof AJ. The effectiveness of a web-based  
10 self-help intervention to reduce suicidal thoughts: a randomized controlled trial.  
11  
12 *Trials* 2010; **11**: 25.  
13
- 14  
15 8. Farrer, L., et al.. Internet-based CBT for depression with and without telephone  
16 tracking in a national helpline: randomised controlled trial. *PLoS One* 2011; **6**:  
17 e28099.  
18  
19
- 20  
21 9. Farrer L et al. Web-based cognitive behavior therapy for depression with and  
22 without telephone tracking in a national helpline: secondary outcomes from a  
23 randomized controlled trial. *J Med Internet Res* 2012; **14**: e68.  
24  
25
- 26  
27 10. Nock MK et al. Cross-national analysis of the associations among mental  
28 disorders and suicidal behavior: findings from the WHO World Mental Health  
29 Surveys. *PLoS Med* 2009; **6**:e1000123.  
30  
31
- 32  
33 11. Andrews G, Slade T. Interpreting scores on the Kessler Psychological Distress  
34 Scale (K10). *Aust N Z J Public Health* 2001; **25**: 494-7.  
35  
36
- 37  
38 12. Christensen H, Griffiths KM, Jorm AF. Delivering interventions for depression  
39 by using the internet: randomised controlled trial. *BMJ* 2004; **328**: 265.  
40  
41
- 42  
43 13. Tennant C. The general health questionnaire: a valid index of psychological  
44 impairment in Australian populations. *Medical Journal of Australia* 1977; **2**:392-  
45 394.  
46  
47
- 48  
49 14. Goldney R., et al. Suicidal ideation: its enduring nature and associated  
50 morbidity. *Acta Psychiat Scand* 1991; **83**: 115-20.  
51  
52  
53  
54  
55  
56  
57  
58  
59  
60

- 1  
2  
3  
4 15. Goldney R et al. Suicidal ideation in a random community sample: attributable  
5 risk due to depression and psychosocial and traumatic events. Australian and NZ  
6 J Psychiat 2000; **34**: 98-106.  
7  
8
- 9  
10  
11 16. Goldney R et al. Anger, suicidal ideation, and attempted suicide: a prospective  
12 study. Comprehen Psychiat 1997; **38**: 264-8.  
13
- 14  
15 17. Goldney R et al. Suicidal ideation in a young adult population. Acta Psychiatr  
16 Scandin 1989; **79**: 481-489.  
17
- 18  
19 18. Watson D et al. The measurement of suicidal ideation. Crisis 2001; **22**: 12-14.  
20
- 21  
22 19. Radloff LS. The CES-D scale: A self-report depression scale for research in the  
23 general population. Applied Psycholog Measurem 1977; **1**:385-401.  
24
- 25  
26 20. Roberts RE, Vernon SW. The Center for Epidemiologic Studies Depression  
27 Scale: It's use in a community sample. Am J Psychiat 1983; **140**: 41-46.  
28
- 29  
30 21. Lovibond SH, Lovibond PF. Manual for the Depression Anxiety Stress Scales.  
31 Sydney: Psychology Foundation 2<sup>nd</sup> Edition. 1995.  
32
- 33  
34 22. Antony MMB et al. Psychometric properties of the 42-item and 21-item versions  
35 of the Depression Anxiety Stress Scales (DASS) in clinical groups and a  
36 community sample. Psycholog Assess 1998; **10**: 176-181.  
37
- 38  
39 23. Lovibond SaLP. The structure of negative emotional states: Comparison of the  
40 Depression Anxiety Stress Scales (DASS) with the Beck Depression and  
41 Anxiety Inventories. Behav Res Ther 1995; **33**: 8.  
42
- 43  
44 24. Thompson EA et al. The mediating roles of anxiety depression, and  
45 hopelessness on adolescent suicidal behaviors. Suicide Life Threat Behav 2005;  
46  
47  
48  
49  
50  
51  
52  
53  
54  
55  
56  
57  
58  
59  
60  
**35**: 14-34.

- 1
- 2
- 3
- 4 25. Cuijpers P., et al. The effects of psychotherapy for adult depression on
- 5 suicidality and hopelessness: a systematic review and meta-analysis. *J Affect*
- 6 *Disord* 2013; **144**:183-90.
- 7
- 8
- 9
- 10 26. Christensen H, Griffiths KM, and Farrer L. Adherence in internet interventions
- 11 for anxiety and depression. *J Med Internet Res* 2009; **11**: e13.
- 12
- 13 27. Flay BR. Efficacy and effectiveness trials (and other phases of research) in the
- 14 development of health promotion programs. *Prev Med* 1986; **15**: 451-74.
- 15
- 16 28. Michelmore L, Hindley P. Help-seeking for suicidal thoughts and self-harm in
- 17 young people: a systematic review. *Suicide Life Threat Behav* 2012; **42**: 507-24.
- 18
- 19
- 20
- 21
- 22
- 23
- 24
- 25
- 26
- 27
- 28
- 29
- 30
- 31
- 32
- 33
- 34
- 35
- 36
- 37
- 38
- 39
- 40
- 41
- 42
- 43
- 44
- 45
- 46
- 47
- 48
- 49
- 50
- 51
- 52
- 53
- 54
- 55
- 56
- 57
- 58
- 59
- 60

Figure 1: Trial Flow Diagram

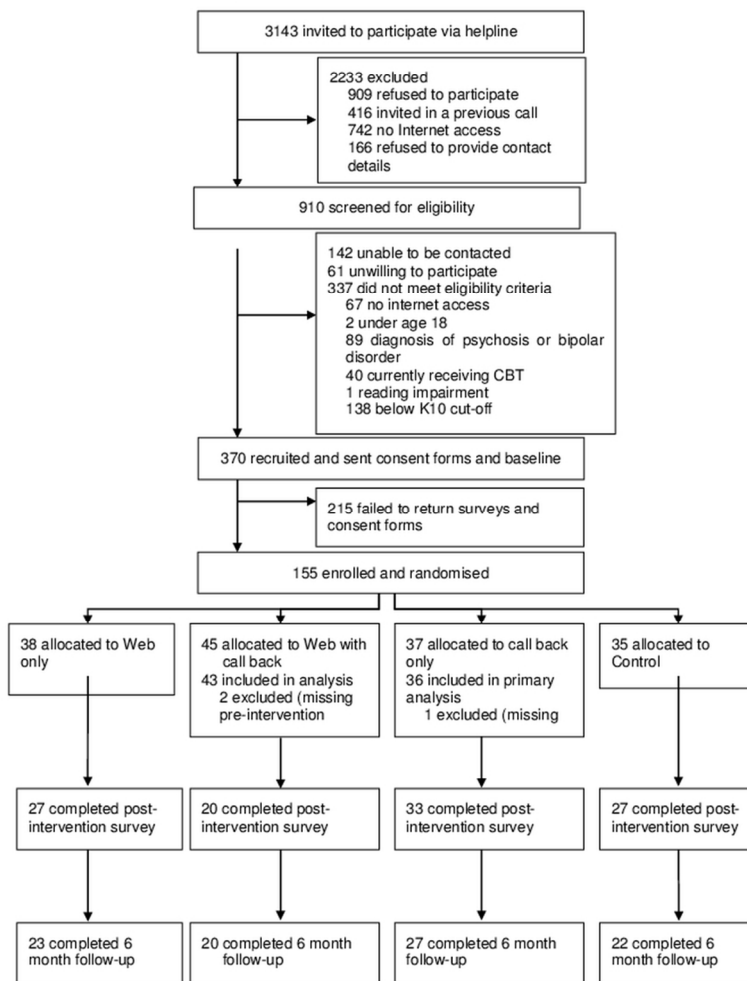

90x116mm (300 x 300 DPI)

1  
2  
3  
4  
5  
6  
7  
8  
9  
10  
11  
12  
13  
14  
15  
16  
17  
18  
19  
20  
21  
22  
23  
24  
25  
26  
27  
28  
29  
30  
31  
32  
33  
34  
35  
36  
37  
38  
39  
40  
41  
42  
43  
44  
45  
46  
47  
48  
49  
50  
51  
52  
53  
54  
55  
56  
57  
58  
59  
60

**Figure 2:** Estimated marginal means for suicidal ideation across measurement occasions.

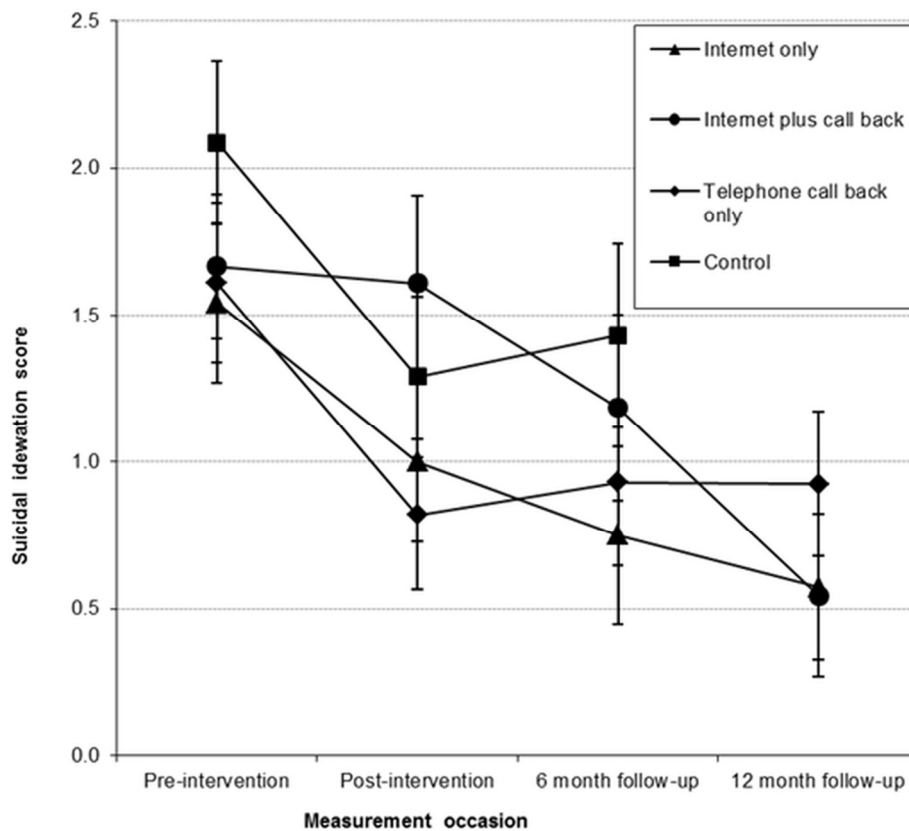

94x90mm (300 x 300 DPI)

only
